# Supplementary material for: Importance Degree Evaluation of Spare Parts Based on Clustering Algorithm and Back-Propagation Neural Network
Source: Hindawi journal article supplement (doi:10.1155/2020/6161825), 2020-05-22
Supplement: f1 [file 6161825.f1.zip]

Archive with 4 entries (4 files):
- 6161825.f1/Appendix 1.xls
- 6161825.f1/Appendix 2.xls
- 6161825.f1/Appendix 3.xls
- 6161825.f1/Explanation of appendix.doc
