# Supplementary material for: Importance Degree Evaluation of Spare Parts Based on Clustering Algorithm and Back-Propagation Neural Network
Source: Hindawi journal article supplement (doi:10.1155/2020/6161825), 2020-05-22
Supplement: f1 [file 6161825.f1.zip › 6161825.f1/Appendix 1.xls]

## Sheet: 原始数据
Num.	Part Number	X1	X2	X3	X4	X5	X6	X7	X8	y
1	3721020C	1	0	100	1	0	1	2	100	0.00197736
2	A 881 316 05 52	3.5	1	850	1	0	1	7	350	0.0570879
3	A 881 350 00 06	1.5	0	850	1	0	1	3	150	0.0567341
4	A 881 316 04 52	3.5	1	850	1	0	1	7	350	0.0570879
5	A 520 541 05 01	1	2	2703.52	3	257.52	1	2	100	0.19209
6	A 881 500 03 55	1	1	2703.52	1	0	1	2	100	0.191947
7	A 518 820 25 75	1	1	2703.52	1	0	1	2	100	0.191947
8	A 881 491 17 41	1	1	400	1	0	1	2	100	0.0239602
9	A 881 490 06 40	1.5	2	400	1	0	1	3	150	0.0241275
10	A 881 491 16 41	0.5	1	400	1	0	1	1	50	0.0238981
11	A 881 491 00 40	0.5	1	400	1	0	1	1	50	0.0238981
12	A 881 331 02 28	4	1	3652.64	20	25.2	1	8	400	0.261637
13	A 881 331 01 28	4	1	3652.64	26	19.6	1	8	400	0.261668
14	A 520 541 05 02	1	2	3652.64	3	255.84	1	2	100	0.261306
15	A 518 750 00 18	0.5	1	4650.16	7	80.88	1	1	50	0.333886
16	A 518 671 02 10	1.5	1	4650.16	10	66.5	1	3	150	0.334024
17	A 881 820 04 61	1	1	4650.16	8	66.12	1	2	100	0.333951
18	A 881 820 03 61	1	1	4650.16	8	66.12	1	2	100	0.333951
19	A 881 698 04 75	1	1	906.8	5	26.46	1	2	100	0.0609429
20	A 881 820 02 56	0.5	1	906.8	10	12.88	1	1	50	0.0609053
21	A 881 820 01 56	0.5	1	906.8	10	12.88	1	1	50	0.0609053
22	A 818 500 00 02	2	0	460	1	0	1	4	200	0.0283551
23	A 881 491 17 42	1	0	400	1	0	1	2	100	0.0238552
24	A 881 491 16 42	0.5	1	400	1	0	1	1	50	0.0238981
25	A 518 891 02 17	4	2	548.2	8	18.2	1	8	400	0.0352845
26	A 518 820 25 76	1	1	200	1	0	1	2	100	0.00937502
27	A 881 500 03 56	1	1	200	1	0	1	2	100	0.00937502
28	A 881 890 00 04	2.5	0	250	0	0	1	5	250	0.0130976
29	A 520 541 05 03	1	2	2503.52	2	257.52	1	2	100	0.1775
30	A 881 371 01 01	2	1	200	0	0	1	4	200	0.00949419
31	A 881 331 02 29	4	1	1164.8	6	25.2	1	8	400	0.080136
32	A 881 331 01 29	4	1	1164.8	8	19.6	1	8	400	0.0801458
33	A 881 490 04 20	0.5	1	469.52	1	51.52	1	1	50	0.0289734
34	A 945 420 03 38	1.5	1	531.9	2	46.9	1	3	150	0.0336516
35	A 346 353 07 35	6.5	1	2182.1	9	34.86	1	13	650	0.154651
36	A 881 500 00 99	2	1	4640.7	1	403.7	1	4	200	0.333386
37	A 818 260 07 51	0.5	0	100	1	0	1	1	50	0.00191518
38	1109010pb	0.5	0	100	2	0	1	1	50	0.00192038
39	1101140	0.5	0	50	1	0	1	1	50	-0.00173113
40	A 506 460 01 01	1	0	150	1	0	1	2	100	0.00562367
41	A 518 460 00 09	1	0	100	1	0	1	2	100	0.00197736
42	A 881 350 00 07	1	0	200	1	0	1	2	100	0.00926998
43	A 881 491 04 41	1	0	200	1	0	1	2	100	0.00926998
44	A 818 522 00 02	1	1	374.26	3	15.26	1	2	100	0.0220952
45	A 881 491 04 42	1	0	374.26	1	0	1	2	100	0.0219781
46	A 518 751 00 14	0.5	0	374.26	1	0	1	1	50	0.0219159
47	A 070 490 06 61	1.5	1	933.92	2	67.92	1	3	150	0.0629716
48	A 881 490 04 40	1.5	0	933.92	1	0	1	3	150	0.0628541
49	A 818 313 01 56	1.5	0	329.64	1	0	1	3	150	0.0187863
50	A 818 522 00 86	0.5	2	329.64	25	3.64	1	1	50	0.0189974
51	A 518 464 00 02	1	0	329.64	1	0	1	2	100	0.0187241
52	A 881 491 17 43	0.5	1	400	1	0	1	1	50	0.0238981
53	A 881 491 00 41	1	1	400	1	0	1	2	100	0.0239602
54	A 518 544 15 03	0.5	1	1856.8	12	22.12	1	1	50	0.130196
55	A 818 522 00 03	1	1	1856.8	17	15.26	1	2	100	0.130284
56	A 881 320 00 02-03	4	1	1856.8	1	0	1	8	400	0.130572
57	A 818 520 00 19	1	1	1856.8	5	49.42	1	2	100	0.130225
58	A 881 890 00 05	1	2	2565.2	5	132.44	1	2	100	0.182
59	A 881 323 01 00	0.5	1	2565.2	14	25.34	1	1	50	0.181868
60	A 070 490 00 09	1	1	2565.2	6	59.22	1	2	100	0.181892
61	A 518 891 02 18	4	2	2565.2	39	18.2	1	8	400	0.182538
62	A 518 820 25 77	1	1	300	1	0	1	2	100	0.0166676
63	A 881 500 03 57	2	1	300	1	0	1	4	200	0.016792
64	A 881 890 02 05	5	1	500	1	0	1	10	500	0.0317504
65	A 518 460 00 10	1	1	100	0	0	1	2	100	0.00207721
66	A 518 682 01 24	1	0	100	1	0	1	2	100	0.00197736
67	A 881 491 04 43	1	0	250	1	0	1	2	100	0.0129163
68	A 881 490 04 41	1.5	0	250	1	0	1	3	150	0.0129785
69	A 818 313 01 57	1.5	0	250	1	0	1	3	150	0.0129785
70	A 881 491 17 44	1	1	350	1	0	1	2	100	0.0203139
71	A 881 491 00 42	2	1	350	1	0	1	1	50	0.0204102
72	A 881 490 06 41	1.5	2	350	1	0	1	3	150	0.0204812
73	A 881 491 16 43	0.5	1	350	1	0	1	1	50	0.0202518
74	A 881 500 03 58	1	1	200	1	0	1	2	100	0.00937502
75	A 128 891 01 46	0.5	1	2020.42	9	30.1	1	1	50	0.142114
76	A 518 891 02 19	4	2	2020.42	31	18.2	1	8	400	0.142768
77	A 818 500 00 03	2	0	2020.42	1	0	1	4	200	0.142151
78	A 881 820 03 62	1	1	2020.42	4	66.12	1	2	100	0.142154
79	A 881 890 00 77	2.5	0	1011.04	1	0	1	5	250	0.0686025
80	A 881 890 01 06	0.5	1	1011.04	2	66.22	1	1	50	0.0684711
81	A 518 891 02 05	1	1	1011.04	16	8.82	1	2	100	0.0686001
82	A 881 491 17 45	1	0	682.06	1	0	1	2	100	0.0444247
83	A 818 520 00 20	1	1	682.06	2	49.42	1	2	100	0.0445403
84	A 818 522 00 87	0.5	2	682.06	52	3.64	1	1	50	0.0448386
85	A 518 891 02 06	2.5	2	593.64	9	17.64	1	5	250	0.0384168
86	A 881 890 02 06	5	1	1440.8	2	100.8	1	10	500	0.100375
87	A 518 295 02 06	1	0	150	1	0	1	2	100	0.00562367
88	A 881 698 04 76	1	1	906.8	5	26.46	1	2	100	0.0609429
89	A 881 490 06 42	1.5	2	400	1	0	1	3	150	0.0241275
90	A 881 491 16 44	0.5	1	400	1	0	1	1	50	0.0238981
91	A 881 491 00 43	1.5	1	400	1	0	1	1	50	0.0240037
92	A 881 491 17 46	1	1	400	1	0	1	2	100	0.0239602
93	A 881 890 01 07	0.5	2	1128.44	2	132.44	1	1	50	0.0771448
94	A 881 371 01 02	2	1	873.12	1	72.12	1	4	200	0.0585952
95	A 881 522 03 39	1	0	100	1	0	1	2	100	0.00197736
96	A 881 698 04 77	1	1	906.8	5	26.46	1	2	100	0.0609429
97	A 881 491 17 47	1	1	400	1	0	1	2	100	0.0239602
98	A 881 491 16 45	0.5	1	400	1	0	1	1	50	0.0238981
99	A 881 491 00 44	0.5	1	400	1	0	1	1	40	0.0238962
100	A 881 490 06 43	1.5	2	401	1	0	1	3	150	0.0242004
101	A 881 500 03 59	1	2	200	1	0	1	2	100	0.00948007
102	A 881 698 04 78	1	1	906.8	5	26.46	1	2	100	0.0609429
103	A 881 540 01 46	1	0	100	1	0	1	2	100	0.00197736
104	A 881 540 01 47	1	0	100	1	0	1	2	100	0.00197736
105	A 881 460 00 80	1	1	624.4	1	64.4	1	2	100	0.0403318
106	A 881 491 16 46	0.5	1	400	1	0	1	1	50	0.0238981
107	A 881 491 00 45	1	1	400	1	0	1	2	60	0.023953
108	A 881 491 17 48	0.5	1	400	1	0	1	1	50	0.0238981
109	A 881 490 06 44	1.5	2	402	1	0	1	3	150	0.0242733
110	A 520 541 05 04	1	2	300	1	0	1	2	100	0.0167727
111	A 881 500 03 54	1	1	300	1	0	1	2	100	0.0166676
112	A 881 240 02 18	1.5	1	593.46	2	54.46	1	3	150	0.0381418
113	A 518 830 02 62	3.5	0	350	1	0	1	7	350	0.0205198
114	A 818 313 01 58	2.5	0	906.34	1	0	1	5	250	0.0609672
115	A 881 323 01 01	0.5	1	906.34	5	25.34	1	1	50	0.060847
116	A 881 320 00 02-04	4	1	906.34	1	0	1	8	400	0.0612588
117	A 881 470 00 42	3	0	300	2	0	1	6	300	0.0168165
118	A 518 830 02 63	3.5	1	2206.92	1	177.72	1	7	350	0.156062
119	A 881 542 00 17	0.5	1	2206.92	17	18.2	1	1	50	0.155755
120	A 170 295 00 07	1	1	392.98	2	35.98	1	2	100	0.0234574
121	A 881 470 00 43	3	1	463.02	3	20.02	1	6	300	0.0288174
122	A 257 350 00 24	6.5	1	2154.8	5	64.54	1	13	650	0.152643
123	A 518 720 05 10	1.5	0	250	1	0	1	3	150	0.0129785
124	A 881 491 04 44	1	0	100	1	0	1	2	100	0.00197736
125	A 881 491 16 47	0.5	1	400	1	0	1	1	50	0.0238981
126	A 881 491 00 46	0.5	1	400	1	0	1	1	30	0.0238944
127	A 881 491 17 49	1	1	400	1	0	1	2	100	0.0239602
128	A 881 490 06 45	1.5	2	403	1	0	1	3	150	0.0243463
129	A 881 500 03 53	1	1	200	1	0	1	2	100	0.00937502
130	A 518 891 02 20	5	2	648.2	10	18.2	1	10	500	0.0427119
131	A 518 460 00 11	1	1	562.84	1	56.84	1	2	100	0.0358416
132	A 520 541 05 05	1	2	3668.32	3	257.52	1	2	100	0.262449
133	A 881 331 01 30	4	1	3668.32	26	19.6	1	8	400	0.262812
134	A 881 331 02 30	4	1	3668.32	20	25.2	1	8	400	0.262781
135	A 518 820 00 80	0.5	1	4348.04	16	38.64	1	1	50	0.311896
136	A 881 820 00 85	1	1	4348.04	1	339.4	1	2	100	0.311912
137	A 881 491 04 45	1	0	4348.04	1	0	1	2	100	0.31177
138	A 518 430 02 26	0.5	0	4348.04	1	0	1	1	50	0.311708
139	A 881 490 04 42	1.5	0	280	1	0	1	3	150	0.0151663
140	A 518 820 00 81	0.5	1	514.64	2	38.64	1	1	50	0.0322677
141	A 881 820 00 86	1.5	0	514.64	1	0	1	3	150	0.0322776
142	A 881 491 04 46	1	0	551.3	1	0	1	2	100	0.0348889
143	A 881 320 00 02-05	4	1	551.3	12	6.3	1	8	400	0.035425
144	A 881 490 06 46	1.5	1	404	1	0	1	3	150	0.0243141
145	A 881 491 16 48	0.5	1	400	1	0	1	1	50	0.0238981
146	A 881 491 00 47	1	1	400	1	0	1	2	100	0.0239602
147	A 881 491 17 50	0.5	1	400	1	0	1	1	50	0.0238981
148	A 881 320 01 02	4	1	1400	1	0	1	8	400	0.0972595
149	A 518 820 25 78	1	1	1400	1	0	1	2	100	0.0968864
150	A 881 500 03 52	1	2	1400	1	0	1	2	100	0.0969914
151	A 881 320 01 12	1	2	1400	1	0	1	2	100	0.0969914
152	A 520 541 05 06	1	2	1400	1	0	1	2	100	0.0969914
153	A 881 500 00 98	2	1	1400	1	63	1	4	200	0.0970175
154	A 881 323 01 02	1	2	621.96	3	50.68	1	2	100	0.0402678
155	A 818 522 00 88	0.5	4	621.96	48	7.28	1	1	50	0.0406454
156	A 518 891 02 21	4	2	648.2	10	18.2	1	8	400	0.0425875
157	A 881 491 16 49	1	0	648.2	1	0	1	2	100	0.0419555
158	A 518 460 00 12	1	1	100	0	0	1	2	100	0.00207721
159	A 881 698 04 79	1	1	906.8	5	26.46	1	2	100	0.0609429
160	A 881 490 06 47	1.5	2	410	1	0	1	3	150	0.0248567
161	A 881 491 16 50	1	1	400	1	0	1	2	100	0.0239602
162	A 881 491 17 51	0.5	1	400	1	0	1	1	50	0.0238981
163	A 881 491 00 48	0.5	1	400	1	0	1	1	20	0.0238926
164	A 818 500 00 04	2	0	400	1	0	1	4	200	0.0239796
165	A 881 323 01 03	0.39	1	494.84	3	25.34	1	1	38.5	0.0308138
166	A 881 470 05 01	2.5	0	494.84	1	0	1	5	250	0.0309581
167	A 881 500 03 51	1	1	200	1	0	1	2	100	0.00937502
168	A 881 320 00 02-06	4	1	400	1	0	1	8	400	0.0243334
169	A 881 323 01 04	0.5	1	2292.74	13	25.34	1	1	50	0.161993
170	A 881 470 05 02	2.5	1	2292.74	1	191.4	1	5	250	0.162197
171	A 520 429 01 44	1	1	258.46	2	19.46	1	2	100	0.0136456
172	A 881 331 02 31	4	1	1164.8	6	25.2	1	8	400	0.080136
173	A 505 350 00 09	2	1	2420.9	1	201.9	1	4	200	0.171483
174	A 505 541 35 01	10	0	4578.8	5	0	1	20	1000	0.329739
175	1109011D	0.5	0	50	6	0	1	1	50	-0.0017051
176	A 881 540 01 48	1	0	100	1	0	1	2	100	0.00197736
177	A 881 540 01 28	1	0	100	1	0	1	2	100	0.00197736
178	A 881 491 00 49	0.5	1	400	1	0	1	1	30	0.0238944
179	A 881 491 16 51	0.5	1	400	1	0	1	1	50	0.0238981
180	A 881 490 06 48	1.5	2	430	1	0	1	3	150	0.0263153
181	A 881 491 17 52	1	1	400	1	0	1	2	100	0.0239602
182	A 881 500 03 50	1	1	200	1	0	1	2	100	0.00937502
183	A 500 400 23 02	2	1	1694.72	3	69.36	1	4	200	0.118521
184	916316681	0.5	0	50	1	0	1	1	50	-0.00173113
185	A 818 520 00 21	1	1	580.24	2	49.42	1	2	100	0.037115
186	A 818 522 00 89	0.5	1	580.24	45	1.82	1	1	50	0.0372715
187	A 881 491 16 52	0.5	1	400	1	0	1	1	50	0.0238981
188	A 881 491 01 40	1	1	400	1	0	1	1	50	0.0239509
189	A 881 491 17 53	1	1	400	1	0	1	2	100	0.0239602
190	A 881 490 06 49	1.5	3	400	1	0	1	3	150	0.0242325
191	A 881 500 03 49	1	1	200	1	0	1	2	100	0.00937502
192	A 881 540 01 49	0.5	1	1741.2	1	181.2	1	1	50	0.121726
193	A 518 830 02 64	3.5	0	350	0	0	1	7	350	0.0205146
194	A 518 671 02 11	1.5	0	4650.16	1	0	1	3	150	0.333865
195	A 881 698 04 74	1	1	906.8	5	26.46	1	2	100	0.0609429
196	A 881 500 03 48	1	1	200	1	0	1	2	100	0.00937502
197	A 881 490 06 20	1.5	1	350	1	0	1	3	150	0.0203761
198	A 881 491 16 53	0.5	1	350	1	0	1	1	50	0.0202518
199	A 881 491 01 41	0.6	1	350	1	0	1	1	50	0.0202623
200	A 881 491 17 54	1	1	350	1	0	1	2	100	0.0203139
201	A 881 698 04 73	1	1	906.8	5	26.46	1	2	100	0.0609429
202	A 881 490 06 21	1.5	1	400	1	0	1	3	150	0.0240224
203	A 881 491 01 42	0.5	1	600	1	0	1	1	50	0.0384833
204	A 881 491 17 55	1	1	400	1	0	1	2	100	0.0239602
205	A 881 491 16 54	0.5	1	400	1	0	1	1	50	0.0238981
206	A 881 500 03 47	1	1	200	1	0	1	2	100	0.00937502
207	A 881 698 04 72	1	1	906.8	5	26.46	1	2	100	0.0609429
208	A 881 490 06 22	1.5	5	400	1	0	1	3	150	0.0244426
209	A 881 491 16 55	0.5	1	400	1	0	1	1	50	0.0238981
210	A 881 491 17 56	1	1	400	1	0	1	2	100	0.0239602
211	A 881 491 01 43	0.5	1	360	1	0	1	1	50	0.020981
212	A 818 431 01 43	1	0	560	1	0	1	2	100	0.0355234
213	A 818 500 00 05	2	0	560	1	0	1	4	200	0.0356478
214	A 518 540 08 82	1.5	0	150	1	0	1	3	150	0.00568586
215	A 881 470 05 03	2.5	1	2499.08	2	191.4	1	5	250	0.17725
216	A 881 323 01 05	0.5	2	2499.08	14	50.68	1	1	50	0.177154
217	A 881 500 03 46	1	1	200	1	0	1	2	100	0.00937502
218	A 518 830 02 65	3.5	1	2008.72	1	177.72	1	7	350	0.141608
219	A 257 353 00 35	6.5	1	1680.56	5	49	1	13	650	0.118057
220	A 520 350 01 45	14	1	9848.12	14	85.2	1	28	1400	0.714669
221	A 505 356 23 01	2.5	1	1303.92	1	112.92	1	5	250	0.0900783
222	A 520 250 01 15	10.5	1	1492.32	4	54.32	1	21	1050	0.104822
223	A 881 500 00 97	2	1	4640.7	1	325	1	4	200	0.333377
224	A 881 491 01 44	0.5	1	430	1	0	1	1	50	0.0260858
225	A 881 490 06 23	1.5	6	400	1	0	1	3	150	0.0245477
226	A 881 491 17 57	1	1	400	1	0	1	2	100	0.0239602
227	A 881 491 16 56	0.5	1	400	1	0	1	1	50	0.0238981
228	A 881 500 03 45	1	1	200	1	0	1	2	100	0.00937502
229	A 818 520 00 22	1	1	1742.54	5	49.42	1	2	100	0.121893
230	A 881 320 00 02-07	4	1	1742.54	1	0	1	8	400	0.12224
231	A 881 371 01 03	2	0	1742.54	1	0	1	4	200	0.121886
232	A 818 500 00 06	2	0	1742.54	1	0	1	4	200	0.121886
233	A 881 323 01 06	0.5	2	462.68	3	50.68	1	1	50	0.02859
234	A 881 493 12 15	1	0	356	1	0	1	2	100	0.0206465
235	A 881 500 03 44	1	1	200	1	0	1	2	100	0.00937502
236	A 881 490 06 24	1.5	4	400	1	0	1	3	150	0.0243376
237	A 881 491 01 45	0.5	1	401	1	0	1	1	50	0.023971
238	A 881 491 16 57	0.5	1	400	1	0	1	1	50	0.0238981
239	A 881 491 17 58	1	2	400	1	0	1	2	100	0.0240653
240	A 500 401 23 02	2	1	1739.52	3	71.76	1	4	200	0.121789
241	A 881 698 04 71	1	1	906.8	5	26.46	1	2	100	0.0609429
242	A 881 491 01 46	0.5	1	302	1	0	1	1	50	0.0167513
243	A 881 491 16 58	0.5	1	400	1	0	1	1	50	0.0238981
244	A 881 490 06 25	1.5	2	400	1	132	1	3	150	0.0241416
245	A 881 491 17 59	1	1	400	1	0	1	2	100	0.0239602
246	A 881 820 00 87	1.5	0	1328.44	1	0	1	3	150	0.0916249
247	A 881 890 01 05	1	2	1328.44	3	132.44	1	2	100	0.0917974
248	A 881 500 03 43	1	1	200	1	0	1	2	100	0.00937502
249	A 518 544 16 03	0.5	1	1321.76	8	22.12	1	1	50	0.0911573
250	A 818 520 00 23	1	1	1321.76	4	49.42	1	2	100	0.0912015
251	A 881 890 00 08	0.5	1	1321.76	3	66.22	1	1	50	0.0911359
252	A 818 313 00 56	1	0	100	1	0	1	2	100	0.00197736
253	A 881 820 03 63	1	1	717.12	1	66.12	1	2	100	0.0470937
254	A 881 540 01 16	2.5	0	250	0	0	1	5	250	0.0130976
255	1109010D	0.5	0	149.25	1	0	1	1	50	0.00550679
256	A 881 491 04 47	1	0	314.82	1	0	1	2	100	0.0176434
257	A 881 490 04 43	1.5	0	314.82	1	0	1	3	150	0.0177055
258	A 818 522 00 90	0.5	1	314.82	24	1.82	1	1	50	0.0178062
259	A 881 540 01 29	1	0	785	1	0	1	2	100	0.0519318
260	A 818 500 00 07	2	0	785	1	0	1	4	200	0.0520561
261	A 518 830 02 66	1.5	0	785	1	0	1	3	150	0.0519939
262	A 881 491 04 48	1	0	785	1	0	1	2	100	0.0519318
263	A 881 820 00 88	1	0	551.3	1	0	1	2	100	0.0348889
264	A 881 491 16 59	0.5	1	400	1	0	1	1	50	0.0238981
265	A 881 490 06 26	1.5	2	400	1	168	1	3	150	0.0241455
266	A 881 491 17 60	1	1	395	1	0	1	2	100	0.0235956
267	A 881 491 01 47	0.5	1	330	1	0	1	1	50	0.0187932
268	A 881 500 03 42	1	1	200	1	0	1	2	100	0.00937502
269	A 881 320 00 02-08	4	1	1304.54	1	0	1	8	400	0.090298
270	A 881 323 01 07	0.5	1	1304.54	7	25.34	1	1	50	0.0898966
271	A 518 891 02 22	5	2	1304.54	20	18.2	1	10	500	0.0906283
272	A 881 890 02 07	5.5	1	1490.8	2	100.8	1	11	550	0.104084
273	A 881 698 04 70	1	1	906.8	5	26.46	1	2	100	0.0609429
274	A 881 491 17 61	1	1	365	1	0	1	2	100	0.0214078
275	A 881 491 16 60	0.5	1	350	1	0	1	1	50	0.0202518
276	A 881 491 01 48	0.5	1	350	1	0	1	1	50	0.0202518
277	A 881 490 06 27	1.5	2	350	1	123	1	3	150	0.0204943
278	A 881 500 03 41	1	1	200	1	0	1	2	100	0.00937502
279	A 518 544 15 04	0.5	1	1365.08	9	22.12	1	1	50	0.0943216
280	A 518 544 16 04	0.5	1	1365.08	9	22.12	1	1	50	0.0943216
281	A 818 520 00 24	1	2	1365.08	4	98.84	1	2	100	0.094471
282	A 518 544 15 05	0.5	1	2493.52	16	22.12	1	1	50	0.176651
283	A 518 544 16 05	0.5	1	2493.52	16	22.12	1	1	50	0.176651
284	A 881 890 00 09	0.5	2	2493.52	5	132.44	1	1	50	0.17671
285	A 818 520 00 25	1	2	2493.52	7	98.84	1	2	100	0.176779
286	A 570 260 00 51	0.5	0	50	0	0	1	1	50	-0.00173634
287	GL-5 85W/90 18L-金帝	4	0	400	1	0	1	16	400	0.0242304
288	A 881 830 05 63	1.5	0	235	1	0	1	3	150	0.0118846
289	A 881 323 01 08	0.5	1	256.34	1	25.34	1	1	50	0.0134242
290	A 881 490 06 28	1.5	2	400	1	88	1	3	150	0.0241369
291	A 881 491 01 49	0.5	1	410	1	0	1	1	50	0.0246273
292	A 881 491 16 61	0.5	1	400	1	0	1	1	50	0.0238981
293	A 881 491 17 62	1	1	402	1	0	1	2	100	0.0241061
294	A 525 330 00 03	1	0	100	1	0	1	2	100	0.00197736
295	A 511 423 00 33	4	1	2354.4	3	84.36	1	8	400	0.16688
296	A 506 461 01 01	1	0	249.23	1	0	1	2	100	0.0128601
297	A 881 490 04 44	1.5	0	150	1	0	1	3	150	0.00568586
298	A 881 323 01 09	0.5	1	707.64	4	25.34	1	1	50	0.0463514
299	A 881 320 00 02-09	4	1	707.64	16	6.3	1	8	400	0.0468471
300	A 818 500 00 08	2	0	200	1	0	1	4	200	0.00939435
301	A 881 491 16 62	0.5	1	400	1	0	1	1	50	0.0238981
302	A 881 491 02 40	0.5	1	413	1	0	1	1	50	0.0248461
303	A 881 491 17 63	1	1	398	1	0	1	2	100	0.0238144
304	A 881 490 06 29	1.5	2	400	1	64	1	3	150	0.0241343
305	A 881 320 00 02-10	4	1	1150	1	0	1	8	400	0.079028
306	A 881 470 00 44	2.5	0	1150	1	0	1	5	250	0.0787364
307	A 505 541 32 01 凌云	1	0	1150	1	0	1	2	100	0.0785498
308	A 881 500 03 40	1	2	1400	1	0	1	2	100	0.0969914
309	A 881 320 01 13	1	2	1400	1	0	1	2	100	0.0969914
310	A 881 500 00 96	2	1	1503	1	100	1	4	200	0.104533
311	A 518 891 02 23	5	2	2289.32	35	18.2	1	10	500	0.162523
312	A 881 890 00 10	1	2	2289.32	5	132.44	1	2	100	0.161881
313	A 881 323 01 10	0.5	2	2289.32	13	50.68	1	1	50	0.161852
314	A 881 540 01 48	0.5	1	2671.06	2	181.2	1	1	50	0.189542
315	A 385 260 05 63	1	1	2671.06	72	5.18	1	2	100	0.18995
316	A 818 553 05 05	1	1	2671.06	4	73.68	1	2	100	0.189603
317	A 881 698 04 69	1	1	906.8	5	26.46	1	2	100	0.0609429
318	A 881 490 06 30	1.5	2	400	1	72	1	3	150	0.0241352
319	A 881 491 17 64	1	1	367	1	0	1	2	100	0.0215537
320	A 881 491 02 41	0.5	1	389	1	0	1	1	50	0.0230959
321	A 881 491 16 63	0.5	1	400	1	0	1	1	50	0.0238981
322	A 881 500 03 39	1	1	200	1	0	1	2	100	0.00937502
323	A 346 353 03 07	6.5	1	1364.56	2	76.56	1	13	650	0.0949993
324	A 881 320 00 02-11	4	1	902.6	20	6.3	1	8	400	0.0610856
325	A 881 491 02 42	0.5	1	463	1	0	1	1	50	0.0284924
326	A 881 491 17 65	1	1	405	1	0	1	2	100	0.0243249
327	A 881 491 16 64	0.5	1	400	1	0	1	1	50	0.0238981
328	A 881 490 06 31	1.5	2	400	1	16	1	3	150	0.0241292
329	A 818 520 00 26	1	1	502.42	1	49.42	1	2	100	0.0314346
330	A 881 820 04 62	1	1	717.12	1	66.12	1	2	100	0.0470937
331	A 881 500 03 38	1	1	300	1	0	1	2	100	0.0166676
332	A 520 541 05 07	1	2	300	1	0	1	2	100	0.0167727
333	A 881 331 01 31	4	1	400	1	0	1	8	400	0.0243334
334	A 881 323 01 11	1	2	956.8	5	50.68	1	2	100	0.0646968
335	A 818 522 00 05	1	1	956.8	5	28.84	1	2	100	0.0645894
336	A 818 522 00 91	0.5	4	956.8	74	7.28	1	1	50	0.0651993
337	A 881 890 00 11	0.5	1	589.22	1	66.22	1	1	50	0.0377042
338	A 881 491 17 66	2	0	748.2	1	0	1	4	200	0.0493725
339	A 518 891 02 24	4	2	748.2	12	18.2	1	8	400	0.0498905
340	A 520 541 05 08	1	2	2503.52	2	257.52	1	2	100	0.1775
341	A 881 520 02 41	1	1	330.28	2	28.28	1	2	100	0.0188841
342	A 881 331 02 32	4	1	605.2	3	25.2	1	8	400	0.0393109
343	A 881 890 03 07	2.5	1	1190.8	1	100.8	1	5	250	0.0818276
344	A 881 432 01 01	1	0	150	0	0	1	2	100	0.00561846
345	0632 702 470	0.5	0	150	11	0	1	1	50	0.00561354
346	A 818 460 01 02	0.5	0	100	1	0	1	1	50	0.00191518
347	A 881 320 00 02-12	4	1	1002.6	22	6.3	1	8	400	0.0683887
348	A 881 491 04 49	1	0	1002.6	1	0	1	2	100	0.0678005
349	A 881 491 02 43	0.5	1	409	1	0	1	1	50	0.0245544
350	A 881 491 16 65	0.5	1	400	1	0	1	1	50	0.0238981
351	A 881 490 06 32	1.5	2	400	1	12.34	1	3	150	0.0241288
352	A 881 491 17 67	1	1	332	1	0	1	2	100	0.0190013
353	A 881 371 01 04	2	0	500	1	0	1	4	200	0.0312722
354	A 818 500 00 09	2	0	777.5	1	0	1	4	200	0.0515092
355	A 881 323 01 12	1	2	777.5	4	50.68	1	2	100	0.051616
356	A 818 522 00 92	0.5	1	777.5	60	1.82	1	1	50	0.051735
357	A 881 500 03 37	1	1	200	1	0	1	2	100	0.00937502
358	A 518 891 02 25	4	2	1237.42	19	18.2	1	8	400	0.0856039
359	A 881 890 00 12	0.5	1	1237.42	3	66.22	1	1	50	0.0849854
360	A 881 420 01 26	1	0	1237.42	1	0	1	2	100	0.084925
361	A 881 890 00 13	0.5	2	5285.24	11	132.44	1	1	50	0.380331
362	A 518 880 02 70	1	1	5285.24	6	109.8	1	2	100	0.38026
363	A 518 750 01 44	1	1	5285.24	12	60.48	1	2	100	0.380286
364	A 881 891 02 46	0.5	1	5285.24	27	27.44	1	1	50	0.380298
365	A 881 890 00 15	5	0	5285.24	6	0	1	10	500	0.38064
366	A 518 462 01 43	1	1	5285.24	110	6.72	1	2	100	0.38079
367	A 518 885 01 22	1	1	5285.24	196	3.78	1	2	100	0.381237
368	A 881 698 04 68	1	2	910.6	5	26.46	1	2	100	0.061325
369	A 881 491 16 66	0.5	1	400	1	0	1	1	50	0.0238981
370	A 881 490 06 33	1.5	2	400	1	18.92	1	3	150	0.0241295
371	A 881 491 17 68	1	1	126	1	0	1	2	100	0.00397849
372	A 881 491 02 44	0.5	1	398	1	0	1	1	50	0.0237522
373	A 881 491 17 69	1	1	362	1	0	1	2	100	0.0211891
374	A 881 490 06 34	1.5	2	400	1	0	1	3	150	0.0241275
375	A 881 491 02 45	0.5	1	364	1	0	1	1	50	0.0212727
376	A 881 491 16 67	0.5	1	400	1	0	1	1	50	0.0238981
377	A 818 313 01 59	1	0	150	1	0	1	2	100	0.00562367
378	A 881 500 03 36	1	1	200	1	0	1	2	100	0.00937502
379	A 520 541 05 09	1	2	100	1	0	1	2	100	0.00218746
380	A 518 822 01 20	0.5	1	877.32	15	8.26	1	1	50	0.0587809
381	A 518 822 00 20	0.5	1	877.32	15	8.26	1	1	50	0.0587809
382	A 881 420 01 48	0.5	1	877.32	15	8.12	1	1	50	0.0587809
383	A 881 323 01 13	1	2	877.32	5	50.68	1	2	100	0.0589006
384	A 881 820 00 89	1	1	3833.4	1	339.4	1	2	100	0.274381
385	A 818 431 01 44	1	1	170.68	3	8.68	1	2	100	0.00724817
386	A 818 540 06 51	0.5	0	1178.44	36	0	1	1	50	0.0807438
387	A 881 890 00 14	0.5	2	1178.44	2	132.44	1	1	50	0.0807911
388	A 881 460 02 01	4	1	4131.94	1	288.1	1	8	400	0.29652
389	A 518 460 00 13	1	1	4131.94	10	56.84	1	2	100	0.296169
390	A 881 522 03 38	1	1	398.36	5	11.2	1	2	100	0.0238627
391	A 881 520 01 33	1	1	398.36	4	13.16	1	2	100	0.0238577
392	A 346 350 11 24	6.5	1	2812.16	5	70.56	1	13	650	0.200582
393	A 881 432 01 02	1	2	970.96	3	106.96	1	2	100	0.0657251
394	A 260 350 01 20 (含止推环)	14	1	9730.08	2	508.56	1	28	1400	0.706043
395	1109003DP	0.5	0	50	1	0	1	1	50	-0.00173113
396	A 881 491 04 50	1	0	314.82	1	0	1	2	100	0.0176434
397	A 881 490 04 45	1.5	0	320	1	0	1	3	150	0.0180833
398	A 881 490 06 35	1.5	2	400	1	0	1	3	150	0.0241275
399	A 881 491 17 70	1	1	331	1	0	1	2	100	0.0189283
400	A 881 491 02 46	0.5	1	329	1	0	1	1	50	0.0187203
401	A 881 491 16 68	0.5	1	400	1	0	1	1	50	0.0238981
402	A 818 520 00 27	1	1	953.72	3	49.42	1	2	100	0.0643566
403	A 881 320 00 02-13	4	1	953.72	21	6.3	1	8	400	0.0648188
404	A 881 500 03 35	1	1	200	1	0	1	2	100	0.00937502
405	A 818 500 00 10	2	0	1108.2	1	0	1	4	200	0.0756259
406	A 881 491 17 71	1	0	1108.2	1	0	1	2	100	0.0755015
407	A 518 891 02 26	4	2	1108.2	17	18.2	1	8	400	0.0761699
408	A 818 553 09 01	1	1	1509.66	4	57.54	1	2	100	0.104905
409	A 818 431 02 15	1	1	1509.66	2	90.12	1	2	100	0.104898
410	A 818 553 10 01	1	1	1374.8	2	109.8	1	2	100	0.0950656
411	A 881 470 05 04	2.5	0	1374.8	1	0	1	5	250	0.0951301
412	A 881 542 00 16	0.5	1	967.96	7	18.2	1	1	50	0.0653504
413	A 881 460 00 81	1	1	967.96	2	71.76	1	2	100	0.0653923
414	3703010TJ	9.5	0	4650.16	1	0	1	19	950	0.33486
415	A 881 698 04 67	1	1	906.8	5	26.46	1	2	100	0.0609429
416	A 881 491 17 72	1	1	416	1	0	1	2	100	0.0251271
417	A 881 490 06 36	1.5	2	400	1	0	1	3	150	0.0241275
418	A 881 491 16 69	0.5	1	400	1	0	1	1	50	0.0238981
419	A 881 491 02 47	0.5	1	423	1	0	1	1	50	0.0255754
420	A 881 891 02 47	1	1	1521.64	8	27.44	1	2	100	0.105796
421	A 881 320 00 02-14	4	1	1521.64	1	0	1	8	400	0.10613
422	A 518 891 02 27	2.5	2	1521.64	23	18.2	1	5	250	0.106165
423	A 881 320 00 02-02	4	1	1521.64	1	0	1	8	400	0.10613
424	A 881 500 03 34	1	1	200	1	0	1	2	100	0.00937502
425	A 818 553 05 06	1	1	781.41	1	73.01	1	2	100	0.0517828
426	A 881 470 05 05	2.5	1	2019.04	1	189.54	1	5	250	0.142237
427	A 881 316 04 53	3.5	1	700	1	0	1	7	350	0.046149
428	A 881 316 05 53	3.5	1	700	1	0	1	7	350	0.046149
429	A 881 371 01 05	2	1	350	1	0	1	4	200	0.0204383
430	A 881 350 00 08	1.5	0	350	1	0	1	3	150	0.0202711
431	A 881 490 06 37	1.5	2	350	1	0	1	3	150	0.0204812
432	A 881 491 16 70	0.5	1	350	1	0	1	1	50	0.0202518
433	A 881 491 02 48	0.5	1	336	1	0	1	1	50	0.0192308
434	A 881 491 17 73	1	1	235	1	0	1	2	100	0.0119274
435	A 881 331 02 33	4	1	800	1	0	1	8	400	0.0535038
436	A 881 331 01 32	4	1	800	1	0	1	8	400	0.0535038
437	A 881 500 03 33	1	1	300	1	0	1	2	100	0.0166676
438	A 505 542 35 01	1	0	100	1	0	1	2	100	0.00197736
439	1101141	0.5	0	112	1	0	1	1	50	0.00279029
440	A 518 431 02 26	0.5	0	150	1	0	1	1	50	0.00556148
441	A 518 682 01 23	1	0	150	1	0	1	2	100	0.00562367
442	A 881 540 03 09	1	1	13705.3	41	47.18	1	2	100	0.994478
443	A 346 350 11 45	0.5	1	13705.3	57	33.46	1	1	50	0.994497
444	A 520 429 01 45	1	1	13705.3	99	19.46	1	2	100	0.994777
445	A 518 544 16 06	0.5	1	13705.3	87	22.12	1	1	50	0.994652
446	A 699 410 03 02	2.5	1	13705.3	16	106.08	1	5	250	0.99454
447	A 818 522 00 93	0.5	4	13705.3	1054	7.28	1	1	50	1
448	A 520 420 00 18	1	2	13705.3	61	62.72	1	2	100	0.994688
449	A 818 522 00 06	1	1	13705.3	67	28.84	1	2	100	0.994611
450	A 818 520 00 28	1	1	13705.3	39	49.42	1	2	100	0.994467
451	A 818 431 01 45	1	1	13705.3	221	8.68	1	2	100	0.99541
452	A 881 290 01 14	1	0	13705.3	1	0	1	2	100	0.994159
453	A 881 350 00 09	1.5	1	13705.3	13	127.56	1	3	150	0.994403
454	A 881 350 01 06	1.5	2	13705.3	31	125.44	1	3	150	0.994601
455	A 881 540 02 38	7	1	13705.3	19	87.72	1	14	700	0.995114
456	A 881 320 00 02-15	3.5	1	13705.3	32	59.22	1	7	350	0.994743
457	A 518 431 08 10	1	1	13705.3	77	24.78	1	2	100	0.994663
458	A 881 410 01 02	2.5	1	13705.3	6	237.3	1	5	250	0.994502
459	A 881 350 02 06	1.5	1	13705.3	13	125.04	1	3	150	0.994402
460	A 881 491 17 74	1	1	312	1	0	1	2	100	0.0175427
461	A 881 491 02 49	0.5	1	407	1	0	1	1	50	0.0244085
462	A 881 491 16 71	0.5	1	400	1	0	1	1	50	0.0238981
463	A 881 490 06 38	1.5	2	400	1	0	1	3	150	0.0241275
464	A 518 891 02 07	5.5	2	893.64	14	17.64	1	11	550	0.0606938
465	A 818 313 01 60	2	0	893.64	1	0	1	4	200	0.0599788
466	A 070 491 00 09	1	1	2047.96	4	66	1	2	100	0.144162
467	A 818 553 10 02	1	1	2047.96	2	109.8	1	2	100	0.144157
468	A 881 520 01 34	1	1	2047.96	22	13.16	1	2	100	0.14425
469	A 881 320 00 02-01	4	1	964.48	2	60.48	1	8	400	0.0655104
470	A 881 490 06 39	1.5	2	400	1	0	1	3	150	0.0241275
471	A 881 491 03 40	0.5	1	325	1	0	1	1	50	0.0184286
472	A 881 491 17 75	1	1	296	1	0	1	2	100	0.0163759
473	A 881 491 16 72	0.5	1	400	1	0	1	1	50	0.0238981
474	A 881 500 03 32	1	1	200	1	0	1	2	100	0.00937502
475	A 881 323 01 14	0.5	1	656.34	4	25.34	1	1	50	0.0426103
476	A 881 320 00 02-16	4	1	656.34	1	0	1	8	400	0.0430273
477	3703010TK	9.5	0	4650.16	10	62.72	1	19	950	0.334914
478	A 881 698 04 66	1	1	906.8	5	26.46	1	2	100	0.0609429
479	A 881 698 04 65	1	1	906.8	5	26.46	1	2	100	0.0609429
480	A 881 490 06 50	1.5	2	400	1	0	1	3	150	0.0241275
481	A 881 491 16 73	0.5	1	400	1	0	1	1	50	0.0238981
482	A 881 491 17 76	0.5	1	289	1	0	1	1	50	0.0158033
483	A 881 491 03 41	1	1	126	1	0	1	2	100	0.00397849
484	A 881 500 03 31	1	1	300	1	0	1	2	100	0.0166676
485	A 518 891 02 28	1.93	2	3228.28	50	18.2	1	5	192.5	0.230694
486	A 881 470 05 06	2.5	1	3228.28	2	191.4	1	5	250	0.230428
487	A 881 320 00 02-17	4	1	3228.28	1	0	1	8	400	0.230589
488	A 881 323 01 15	0.39	2	3228.28	18	50.68	1	1	38.5	0.230339
489	A 818 313 01 61	1	0	887.68	6	0	1	2	100	0.0594458
490	A 818 553 05 07	1	1	887.68	1	73.68	1	2	100	0.0595328
491	A 881 542 00 15	0.5	1	198.2	2	18.2	1	1	50	0.00918872
492	A 881 540 01 17	2.5	0	425.24	1	0	1	5	250	0.0258824
493	A 881 880 02 32	1	1	425.24	6	9.24	1	2	100	0.0258279
494	A 881 520 02 42	1	1	230.32	2	28.28	1	2	100	0.0115944
495	A 881 820 03 64	1	1	1504.8	3	66.12	1	2	100	0.104547
496	A 818 553 05 08	1	1	1504.8	2	73.68	1	2	100	0.104542
497	A 881 470 00 45	3	1	661.22	5	20.02	1	6	300	0.0432817
498	A 881 542 00 14	0.5	1	661.22	5	18.2	1	1	50	0.0429706
499	A 500 370 01 08	2	1	3811.3	1	328.3	1	4	200	0.272893
500	A 881 500 00 95	2	1	4640.7	1	403.7	1	4	200	0.333386
