# Supplementary material for: Importance Degree Evaluation of Spare Parts Based on Clustering Algorithm and Back-Propagation Neural Network
Source: Hindawi journal article supplement (doi:10.1155/2020/6161825), 2020-05-22
Supplement: f1 [file 6161825.f1.zip › 6161825.f1/Appendix 2.xls]

## Sheet: Sheet1
Num	Part Number	F1	F2	F3	y
1	3721020C	0.047283	-0.0206722	0.876791	0.00197736
2	A 881 316 05 52	0.226571	0.0136914	0.806656	0.0570879
3	A 881 350 00 06	0.0878846	-0.00611479	0.884182	0.0567341
4	A 881 316 04 52	0.226571	0.0136914	0.806656	0.0570879
5	A 520 541 05 01	0.123976	0.333966	0.835508	0.19209
6	A 881 500 03 55	0.0691129	0.124744	0.854233	0.191947
7	A 518 820 25 75	0.0691129	0.124744	0.854233	0.191947
8	A 881 491 17 41	0.0503883	0.0491702	0.819483	0.0239602
9	A 881 490 06 40	0.08556	0.0991217	0.753727	0.0241275
10	A 881 491 16 41	0.0158832	0.0592186	0.823406	0.0238981
11	A 881 491 00 40	0.0158832	0.0592186	0.823406	0.0238981
12	A 881 331 02 28	0.289305	0.11824	0.849855	0.261637
13	A 881 331 01 28	0.288172	0.117581	0.849118	0.261668
14	A 520 541 05 02	0.131338	0.364137	0.849545	0.261306
15	A 518 750 00 18	0.0674941	0.247822	0.90124	0.333886
16	A 518 671 02 10	0.133501	0.220724	0.89109	0.334024
17	A 881 820 04 61	0.0989012	0.229698	0.894883	0.333951
18	A 881 820 03 61	0.0989012	0.229698	0.894883	0.333951
19	A 881 698 04 75	0.0601054	0.0827533	0.831684	0.0609429
20	A 881 820 02 56	0.0227811	0.0871173	0.833503	0.0609053
21	A 881 820 01 56	0.0227811	0.0871173	0.833503	0.0609053
22	A 818 500 00 02	0.119219	-0.0289583	0.874375	0.0283551
23	A 881 491 17 42	0.0497216	-0.0108298	0.881316	0.0238552
24	A 881 491 16 42	0.0158832	0.0592186	0.823406	0.0238981
25	A 518 891 02 17	0.263172	0.0672225	0.739621	0.0352845
26	A 518 820 25 76	0.0487625	0.0426086	0.816466	0.00937502
27	A 881 500 03 56	0.0487625	0.0426086	0.816466	0.00937502
28	A 881 890 00 04	0.15201	-0.0463242	0.867251	0.0130976
29	A 520 541 05 03	0.122343	0.326977	0.832458	0.1775
30	A 881 371 01 01	0.117765	0.0220838	0.808586	0.00949419
31	A 881 331 02 29	0.268975	0.030629	0.811859	0.080136
32	A 881 331 01 29	0.267812	0.0282584	0.81099	0.0801458
33	A 881 490 04 20	0.027288	0.091182	0.833066	0.0289734
34	A 945 420 03 38	0.0958407	0.0708978	0.825422	0.0336516
35	A 346 353 07 35	0.451825	0.0206113	0.809304	0.154651
36	A 881 500 00 99	0.238807	0.400788	0.943085	0.333386
37	A 818 260 07 51	0.012778	-0.0106237	0.880714	0.00191518
38	1109010pb	0.0127855	-0.0101958	0.880747	0.00192038
39	1101140	0.0123715	-0.0122641	0.87996	-0.00173113
40	A 506 460 01 01	0.0476894	-0.0190318	0.877545	0.00562367
41	A 518 460 00 09	0.047283	-0.0206722	0.876791	0.00197736
42	A 881 350 00 07	0.0480959	-0.0173914	0.878299	0.00926998
43	A 881 491 04 41	0.0480959	-0.0173914	0.878299	0.00926998
44	A 818 522 00 02	0.0534049	0.0579733	0.821712	0.0220952
45	A 881 491 04 42	0.0495124	-0.0116743	0.880928	0.0219781
46	A 518 751 00 14	0.0150073	-0.00162587	0.884851	0.0219159
47	A 070 490 06 61	0.103531	0.0961975	0.835	0.0629716
48	A 881 490 04 40	0.0885667	-0.00336156	0.885448	0.0628541
49	A 818 313 01 56	0.0836547	-0.0231866	0.876332	0.0187863
50	A 818 522 00 86	0.016926	0.129277	0.761917	0.0189974
51	A 518 464 00 02	0.0491497	-0.0131382	0.880255	0.0187241
52	A 881 491 17 43	0.0158832	0.0592186	0.823406	0.0238981
53	A 881 491 00 41	0.0503883	0.0491702	0.819483	0.0239602
54	A 518 544 15 03	0.0324626	0.124464	0.849446	0.130196
55	A 818 522 00 03	0.0655623	0.112603	0.844542	0.130284
56	A 881 320 00 02-03	0.26926	0.0366739	0.817921	0.130572
57	A 818 520 00 19	0.0726584	0.127149	0.849853	0.130225
58	A 881 890 00 05	0.0965507	0.258221	0.812582	0.182
59	A 881 323 01 00	0.0389137	0.150416	0.860737	0.181868
60	A 070 490 00 09	0.0804863	0.156464	0.862211	0.181892
61	A 518 891 02 18	0.279803	0.146661	0.771078	0.182538
62	A 518 820 25 77	0.0495754	0.0458894	0.817975	0.0166676
63	A 881 500 03 57	0.118585	0.0257925	0.810128	0.016792
64	A 881 890 02 05	0.327241	-0.0279366	0.789606	0.0317504
65	A 518 460 00 10	0.0479421	0.0388999	0.814924	0.00207721
66	A 518 682 01 24	0.047283	-0.0206722	0.876791	0.00197736
67	A 881 491 04 43	0.0485023	-0.015751	0.879054	0.0129163
68	A 881 490 04 41	0.0830073	-0.0257994	0.87513	0.0129785
69	A 818 313 01 57	0.0830073	-0.0257994	0.87513	0.0129785
70	A 881 491 17 44	0.0499818	0.0475298	0.818729	0.0203139
71	A 881 491 00 42	0.0500837	0.0475488	0.818684	0.0204102
72	A 881 490 06 41	0.0851535	0.0974813	0.752972	0.0204812
73	A 881 491 16 43	0.0154768	0.0575782	0.822652	0.0202518
74	A 881 500 03 58	0.0487625	0.0426086	0.816466	0.00937502
75	A 128 891 01 46	0.0354489	0.133146	0.853148	0.142114
76	A 518 891 02 19	0.275314	0.125364	0.762594	0.142768
77	A 818 500 00 03	0.131904	0.0222356	0.897915	0.142151
78	A 881 820 03 62	0.0774945	0.14171	0.855079	0.142154
79	A 881 890 00 77	0.158204	-0.0209283	0.878765	0.0686025
80	A 881 890 01 06	0.0347903	0.117845	0.843725	0.0684711
81	A 518 891 02 05	0.0573248	0.080717	0.830673	0.0686001
82	A 881 491 17 45	0.0520144	-0.00157608	0.885572	0.0444247
83	A 818 520 00 20	0.0630865	0.0873245	0.832031	0.0445403
84	A 818 522 00 87	0.0199956	0.152392	0.76813	0.0448386
85	A 518 891 02 06	0.159916	0.0989639	0.752015	0.0384168
86	A 881 890 02 06	0.356105	0.0614314	0.820679	0.100375
87	A 518 295 02 06	0.0476894	-0.0190318	0.877545	0.00562367
88	A 881 698 04 76	0.0601054	0.0827533	0.831684	0.0609429
89	A 881 490 06 42	0.08556	0.0991217	0.753727	0.0241275
90	A 881 491 16 44	0.0158832	0.0592186	0.823406	0.0238981
91	A 881 491 00 43	0.0389545	0.0525323	0.820761	0.0240037
92	A 881 491 17 46	0.0503883	0.0491702	0.819483	0.0239602
93	A 881 890 01 07	0.0503439	0.219849	0.794731	0.0771448
94	A 881 371 01 02	0.138418	0.0861463	0.830828	0.0585952
95	A 881 522 03 39	0.047283	-0.0206722	0.876791	0.00197736
96	A 881 698 04 77	0.0601054	0.0827533	0.831684	0.0609429
97	A 881 491 17 47	0.0503883	0.0491702	0.819483	0.0239602
98	A 881 491 16 45	0.0158832	0.0592186	0.823406	0.0238981
99	A 881 491 00 44	0.0136079	0.0598708	0.823667	0.0238962
100	A 881 490 06 43	0.0855681	0.0991545	0.753742	0.0242004
101	A 881 500 03 59	0.0494292	0.102609	0.754633	0.00948007
102	A 881 698 04 78	0.0601054	0.0827533	0.831684	0.0609429
103	A 881 540 01 46	0.047283	-0.0206722	0.876791	0.00197736
104	A 881 540 01 47	0.047283	-0.0206722	0.876791	0.00197736
105	A 881 460 00 80	0.065762	0.0936354	0.833632	0.0403318
106	A 881 491 16 46	0.0158832	0.0592186	0.823406	0.0238981
107	A 881 491 00 45	0.0412868	0.0517789	0.820527	0.023953
108	A 881 491 17 48	0.0158832	0.0592186	0.823406	0.0238981
109	A 881 490 06 44	0.0855762	0.0991873	0.753757	0.0242733
110	A 520 541 05 04	0.0502421	0.105889	0.756141	0.0167727
111	A 881 500 03 54	0.0495754	0.0458894	0.817975	0.0166676
112	A 881 240 02 18	0.0979318	0.077273	0.827614	0.0381418
113	A 518 830 02 62	0.22184	-0.0627124	0.860946	0.0205198
114	A 818 313 01 58	0.157353	-0.0243633	0.877185	0.0609672
115	A 881 323 01 01	0.025361	0.0921414	0.835413	0.060847
116	A 881 320 00 02-04	0.261534	0.00549138	0.803582	0.0612588
117	A 881 470 00 42	0.186936	-0.0538765	0.864148	0.0168165
118	A 518 830 02 63	0.274993	0.1606	0.85683	0.156062
119	A 881 542 00 17	0.0345219	0.135832	0.854238	0.155755
120	A 170 295 00 07	0.0579089	0.0700971	0.825424	0.0234574
121	A 881 470 00 43	0.193148	0.023434	0.808154	0.0288174
122	A 257 350 00 24	0.457817	0.0351038	0.81372	0.152643
123	A 518 720 05 10	0.0830073	-0.0257994	0.87513	0.0129785
124	A 881 491 04 44	0.047283	-0.0206722	0.876791	0.00197736
125	A 881 491 16 47	0.0158832	0.0592186	0.823406	0.0238981
126	A 881 491 00 46	0.0113325	0.060523	0.823928	0.0238944
127	A 881 491 17 49	0.0503883	0.0491702	0.819483	0.0239602
128	A 881 490 06 45	0.0855844	0.0992201	0.753772	0.0243463
129	A 881 500 03 53	0.0487625	0.0426086	0.816466	0.00937502
130	A 518 891 02 20	0.33301	0.0512622	0.733349	0.0427119
131	A 518 460 00 11	0.063671	0.0872602	0.83144	0.0358416
132	A 520 541 05 05	0.131819	0.365619	0.850063	0.262449
133	A 881 331 01 30	0.288299	0.118095	0.849355	0.262812
134	A 881 331 02 30	0.289432	0.118754	0.850092	0.262781
135	A 518 820 00 80	0.0562193	0.217425	0.889922	0.311896
136	A 881 820 00 85	0.15389	0.374237	0.935769	0.311912
137	A 881 491 04 45	0.0818141	0.118697	0.940875	0.31177
138	A 518 430 02 26	0.047309	0.128745	0.944799	0.311708
139	A 881 490 04 42	0.0832512	-0.0248152	0.875583	0.0151663
140	A 518 820 00 81	0.0249525	0.0856695	0.831627	0.0322677
141	A 881 820 00 86	0.0851585	-0.0171172	0.879123	0.0322776
142	A 881 491 04 46	0.0509515	-0.00586602	0.883599	0.0348889
143	A 881 320 00 02-05	0.260057	0.0021798	0.799645	0.035425
144	A 881 490 06 46	0.0849258	0.0392529	0.81562	0.0243141
145	A 881 491 16 48	0.0158832	0.0592186	0.823406	0.0238981
146	A 881 491 00 47	0.0503883	0.0491702	0.819483	0.0239602
147	A 881 491 17 50	0.0158832	0.0592186	0.823406	0.0238981
148	A 881 320 01 02	0.265547	0.0216873	0.81103	0.0972595
149	A 518 820 25 78	0.058517	0.0819779	0.834569	0.0968864
150	A 881 500 03 52	0.0591837	0.141978	0.772735	0.0969914
151	A 881 320 01 12	0.0591837	0.141978	0.772735	0.0969914
152	A 520 541 05 06	0.0591837	0.141978	0.772735	0.0969914
153	A 881 500 00 98	0.140782	0.0981776	0.837252	0.0970175
154	A 881 323 01 02	0.0635373	0.146507	0.769535	0.0402678
155	A 818 522 00 88	0.0215759	0.270806	0.644032	0.0406454
156	A 518 891 02 21	0.264	0.0713591	0.741196	0.0425875
157	A 881 491 16 49	0.0517392	-0.00268695	0.885061	0.0419555
158	A 518 460 00 12	0.0479421	0.0388999	0.814924	0.00207721
159	A 881 698 04 79	0.0601054	0.0827533	0.831684	0.0609429
160	A 881 490 06 47	0.0856413	0.0994498	0.753877	0.0248567
161	A 881 491 16 50	0.0503883	0.0491702	0.819483	0.0239602
162	A 881 491 17 51	0.0158832	0.0592186	0.823406	0.0238981
163	A 881 491 00 48	0.00905715	0.0611751	0.824189	0.0238926
164	A 818 500 00 04	0.118732	-0.0309267	0.87347	0.0239796
165	A 881 323 01 03	0.0168463	0.0792707	0.82973	0.0308138
166	A 881 470 05 01	0.154008	-0.0378637	0.870978	0.0309581
167	A 881 500 03 51	0.0487625	0.0426086	0.816466	0.00937502
168	A 881 320 00 02-06	0.257419	-0.0111205	0.795944	0.0243334
169	A 881 323 01 04	0.0366913	0.141049	0.856593	0.161993
170	A 881 470 05 02	0.209559	0.191394	0.868257	0.162197
171	A 520 429 01 44	0.0533397	0.0561661	0.820634	0.0136456
172	A 881 331 02 31	0.268975	0.030629	0.811859	0.080136
173	A 505 350 00 09	0.178305	0.211696	0.875869	0.171483
174	A 505 541 35 01	0.704811	-0.0528931	0.873872	0.329739
175	1109011D	0.0124095	-0.0101246	0.880126	-0.0017051
176	A 881 540 01 48	0.047283	-0.0206722	0.876791	0.00197736
177	A 881 540 01 28	0.047283	-0.0206722	0.876791	0.00197736
178	A 881 491 00 49	0.0113325	0.060523	0.823928	0.0238944
179	A 881 491 16 51	0.0158832	0.0592186	0.823406	0.0238981
180	A 881 490 06 48	0.0828038	0.110106	-0.126821	0.0263153
181	A 881 491 17 52	0.0503883	0.0491702	0.819483	0.0239602
182	A 881 500 03 50	0.0487625	0.0426086	0.816466	0.00937502
183	A 500 400 23 02	0.144531	0.112367	0.842828	0.118521
184	916316681	0.0123715	-0.0122641	0.87996	-0.00173113
185	A 818 520 00 21	0.0622589	0.083984	0.830495	0.037115
186	A 818 522 00 89	0.0180652	0.0850078	0.827891	0.0372715
187	A 881 491 16 52	0.0158832	0.0592186	0.823406	0.0238981
188	A 881 491 01 40	0.0274189	0.0558755	0.822084	0.0239509
189	A 881 491 17 53	0.0503883	0.0491702	0.819483	0.0239602
190	A 881 490 06 49	0.0862266	0.159122	0.691893	0.0242325
191	A 881 500 03 49	0.0487625	0.0426086	0.816466	0.00937502
192	A 881 540 01 49	0.0649096	0.207616	0.873925	0.121726
193	A 518 830 02 64	0.221833	-0.0631403	0.860913	0.0205146
194	A 518 671 02 11	0.118775	0.11856	0.94151	0.333865
195	A 881 698 04 74	0.0601054	0.0827533	0.831684	0.0609429
196	A 881 500 03 48	0.0487625	0.0426086	0.816466	0.00937502
197	A 881 490 06 20	0.0844869	0.0374813	0.814806	0.0203761
198	A 881 491 16 53	0.0154768	0.0575782	0.822652	0.0202518
199	A 881 491 01 41	0.0177839	0.0569096	0.822388	0.0202623
200	A 881 491 17 54	0.0499818	0.0475298	0.818729	0.0203139
201	A 881 698 04 73	0.0601054	0.0827533	0.831684	0.0609429
202	A 881 490 06 21	0.0848933	0.0391217	0.81556	0.0240224
203	A 881 491 01 42	0.017509	0.0657802	0.826423	0.0384833
204	A 881 491 17 55	0.0503883	0.0491702	0.819483	0.0239602
205	A 881 491 16 54	0.0158832	0.0592186	0.823406	0.0238981
206	A 881 500 03 47	0.0487625	0.0426086	0.816466	0.00937502
207	A 881 698 04 72	0.0601054	0.0827533	0.831684	0.0609429
208	A 881 490 06 22	0.08756	0.279122	0.568227	0.0244426
209	A 881 491 16 55	0.0158832	0.0592186	0.823406	0.0238981
210	A 881 491 17 56	0.0503883	0.0491702	0.819483	0.0239602
211	A 881 491 01 43	0.0155581	0.0579063	0.822803	0.020981
212	A 818 431 01 43	0.0510222	-0.0055806	0.88373	0.0355234
213	A 818 500 00 05	0.120032	-0.0256775	0.875884	0.0356478
214	A 518 540 08 82	0.0821945	-0.0290802	0.873622	0.00568586
215	A 881 470 05 03	0.211244	0.198591	0.871403	0.17725
216	A 881 323 01 05	0.0443744	0.222846	0.802141	0.177154
217	A 881 500 03 46	0.0487625	0.0426086	0.816466	0.00937502
218	A 518 830 02 65	0.273382	0.154097	0.85384	0.141608
219	A 257 353 00 35	0.450693	0.0105919	0.803969	0.118057
220	A 520 350 01 45	1.04234	0.152532	0.874683	0.714669
221	A 505 356 23 01	0.185009	0.113738	0.840223	0.0900783
222	A 520 250 01 15	0.726315	-0.0733343	0.770599	0.104822
223	A 881 500 00 97	0.222249	0.355446	0.929931	0.333377
224	A 881 491 01 44	0.0161271	0.0602028	0.823859	0.0260858
225	A 881 490 06 23	0.0882266	0.339122	0.506393	0.0245477
226	A 881 491 17 57	0.0503883	0.0491702	0.819483	0.0239602
227	A 881 491 16 56	0.0158832	0.0592186	0.823406	0.0238981
228	A 881 500 03 45	0.0487625	0.0426086	0.816466	0.00937502
229	A 818 520 00 22	0.0717296	0.1234	0.848129	0.121893
230	A 881 320 00 02-07	0.268332	0.0329252	0.816197	0.12224
231	A 881 371 01 03	0.129645	0.013119	0.893723	0.121886
232	A 818 500 00 06	0.129645	0.013119	0.893723	0.121886
233	A 881 323 01 06	0.0277376	0.151329	0.771056	0.02859
234	A 881 493 12 15	0.0493639	-0.0122734	0.880653	0.0206465
235	A 881 500 03 44	0.0487625	0.0426086	0.816466	0.00937502
236	A 881 490 06 24	0.0868933	0.219122	0.63006	0.0243376
237	A 881 491 01 45	0.0158914	0.0592514	0.823421	0.023971
238	A 881 491 16 57	0.0158832	0.0592186	0.823406	0.0238981
239	A 881 491 17 58	0.0510549	0.10917	0.75765	0.0240653
240	A 500 401 23 02	0.1454	0.115219	0.843905	0.121789
241	A 881 698 04 71	0.0601054	0.0827533	0.831684	0.0609429
242	A 881 491 01 46	0.0150866	0.0560034	0.821928	0.0167513
243	A 881 491 16 58	0.0158832	0.0592186	0.823406	0.0238981
244	A 881 490 06 25	0.113333	0.175172	0.775789	0.0241416
245	A 881 491 17 59	0.0503883	0.0491702	0.819483	0.0239602
246	A 881 820 00 87	0.0917737	0.00958177	0.891399	0.0916249
247	A 881 890 01 05	0.0864823	0.21679	0.793858	0.0917974
248	A 881 500 03 43	0.0487625	0.0426086	0.816466	0.00937502
249	A 518 544 16 03	0.0280831	0.105199	0.841241	0.0911573
250	A 818 520 00 23	0.0683016	0.109167	0.841748	0.0912015
251	A 881 890 00 08	0.0373237	0.128467	0.848446	0.0911359
252	A 818 313 00 56	0.047283	-0.0206722	0.876791	0.00197736
253	A 881 820 03 63	0.0668776	0.0976683	0.835318	0.0470937
254	A 881 540 01 16	0.15201	-0.0463242	0.867251	0.0130976
255	1109010D	0.0131783	-0.00900795	0.881457	0.00550679
256	A 881 491 04 47	0.0490292	-0.0136244	0.880031	0.0176434
257	A 881 490 04 43	0.0835342	-0.0236728	0.876108	0.0177055
258	A 818 522 00 90	0.0157483	0.0673142	0.823189	0.0178062
259	A 881 540 01 29	0.0528512	0.00180115	0.887124	0.0519318
260	A 818 500 00 07	0.121861	-0.0182957	0.879278	0.0520561
261	A 518 830 02 66	0.0873562	-0.00824729	0.883201	0.0519939
262	A 881 491 04 48	0.0528512	0.00180115	0.887124	0.0519318
263	A 881 820 00 88	0.0509515	-0.00586602	0.883599	0.0348889
264	A 881 491 16 59	0.0158832	0.0592186	0.823406	0.0238981
265	A 881 490 06 26	0.120907	0.195913	0.781806	0.0241455
266	A 881 491 17 60	0.0503476	0.0490061	0.819408	0.0235956
267	A 881 491 01 47	0.0153142	0.0569221	0.82235	0.0187932
268	A 881 500 03 42	0.0487625	0.0426086	0.816466	0.00937502
269	A 881 320 00 02-08	0.264771	0.0185554	0.80959	0.090298
270	A 881 323 01 07	0.028613	0.106061	0.841486	0.0898966
271	A 518 891 02 22	0.338421	0.0770742	0.743583	0.0906283
272	A 881 890 02 07	0.391016	0.0530233	0.817511	0.104084
273	A 881 698 04 70	0.0601054	0.0827533	0.831684	0.0609429
274	A 881 491 17 61	0.0501038	0.0480219	0.818955	0.0214078
275	A 881 491 16 60	0.0154768	0.0575782	0.822652	0.0202518
276	A 881 491 01 48	0.0154768	0.0575782	0.822652	0.0202518
277	A 881 490 06 27	0.111032	0.168346	0.77353	0.0204943
278	A 881 500 03 41	0.0487625	0.0426086	0.816466	0.00937502
279	A 518 544 15 04	0.0284428	0.107048	0.841928	0.0943216
280	A 518 544 16 04	0.0284428	0.107048	0.841928	0.0943216
281	A 818 520 00 24	0.0797183	0.199061	0.788828	0.094471
282	A 518 544 15 05	0.0376687	0.147065	0.859184	0.176651
283	A 518 544 16 05	0.0376687	0.147065	0.859184	0.176651
284	A 881 890 00 09	0.061463	0.265917	0.815424	0.17671
285	A 818 520 00 25	0.0889138	0.237367	0.805951	0.176779
286	A 570 260 00 51	0.0123639	-0.012692	0.879926	-0.00173634
287	GL-5 85W/90 18L-金帝	0.349493	-0.0986761	0.847407	0.0242304
288	A 881 830 05 63	0.0828854	-0.0262916	0.874904	0.0118846
289	A 881 323 01 08	0.0200469	0.0691047	0.825474	0.0134242
290	A 881 490 06 28	0.104075	0.149822	0.768435	0.0241369
291	A 881 491 01 49	0.0159645	0.0595467	0.823557	0.0246273
292	A 881 491 16 61	0.0158832	0.0592186	0.823406	0.0238981
293	A 881 491 17 62	0.0504045	0.0492358	0.819513	0.0241061
294	A 525 330 00 03	0.047283	-0.0206722	0.876791	0.00197736
295	A 511 423 00 33	0.29107	0.102458	0.839594	0.16688
296	A 506 461 01 01	0.048496	-0.0157763	0.879042	0.0128601
297	A 881 490 04 44	0.0821945	-0.0290802	0.873622	0.00568586
298	A 881 323 01 09	0.0237382	0.0851946	0.832382	0.0463514
299	A 881 320 00 02-09	0.261359	0.00902055	0.802136	0.0468471
300	A 818 500 00 08	0.117106	-0.0374883	0.870453	0.00939435
301	A 881 491 16 62	0.0158832	0.0592186	0.823406	0.0238981
302	A 881 491 02 40	0.0159889	0.0596451	0.823602	0.0248461
303	A 881 491 17 63	0.050372	0.0491045	0.819453	0.0238144
304	A 881 490 06 29	0.0990255	0.135994	0.764423	0.0241343
305	A 881 320 00 02-10	0.263515	0.0134853	0.807258	0.079028
306	A 881 470 00 44	0.159333	-0.0163693	0.880861	0.0787364
307	A 505 541 32 01 凌云	0.0558181	0.013776	0.892631	0.0785498
308	A 881 500 03 40	0.0591837	0.141978	0.772735	0.0969914
309	A 881 320 01 13	0.0591837	0.141978	0.772735	0.0969914
310	A 881 500 00 96	0.149404	0.122874	0.84499	0.104533
311	A 518 891 02 23	0.34654	0.115801	0.758937	0.162523
312	A 881 890 00 10	0.0943081	0.24917	0.80842	0.161881
313	A 881 323 01 10	0.0426617	0.215536	0.798944	0.161852
314	A 881 540 01 48	0.0724757	0.238551	0.887986	0.189542
315	A 385 260 05 63	0.0704778	0.157043	0.856967	0.18995
316	A 818 553 05 05	0.084374	0.167412	0.866158	0.189603
317	A 881 698 04 69	0.0601054	0.0827533	0.831684	0.0609429
318	A 881 490 06 30	0.100709	0.140604	0.765761	0.0241352
319	A 881 491 17 64	0.05012	0.0480875	0.818985	0.0215537
320	A 881 491 02 41	0.0157938	0.0588577	0.82324	0.0230959
321	A 881 491 16 63	0.0158832	0.0592186	0.823406	0.0238981
322	A 881 500 03 39	0.0487625	0.0426086	0.816466	0.00937502
323	A 346 353 03 07	0.4539	0.0148192	0.803708	0.0949993
324	A 881 320 00 02-11	0.262974	0.0171283	0.80521	0.0610856
325	A 881 491 02 42	0.0163953	0.0612855	0.824357	0.0284924
326	A 881 491 17 65	0.0504289	0.0493342	0.819559	0.0243249
327	A 881 491 16 64	0.0158832	0.0592186	0.823406	0.0238981
328	A 881 490 06 31	0.0889263	0.10834	0.756401	0.0241292
329	A 818 520 00 26	0.0616187	0.081003	0.829288	0.0314346
330	A 881 820 04 62	0.0668776	0.0976683	0.835318	0.0470937
331	A 881 500 03 38	0.0495754	0.0458894	0.817975	0.0166676
332	A 520 541 05 07	0.0502421	0.105889	0.756141	0.0167727
333	A 881 331 01 31	0.257419	-0.0111205	0.795944	0.0243334
334	A 881 323 01 11	0.0662743	0.158348	0.774653	0.0646968
335	A 818 522 00 05	0.0610126	0.0857649	0.832836	0.0645894
336	A 818 522 00 91	0.0244951	0.292916	0.649947	0.0651993
337	A 881 890 00 11	0.0313539	0.103578	0.837329	0.0377042
338	A 881 491 17 66	0.121562	-0.0195031	0.878723	0.0493725
339	A 518 891 02 24	0.264828	0.0754957	0.742771	0.0498905
340	A 520 541 05 08	0.122343	0.326977	0.832458	0.1775
341	A 881 520 02 41	0.0557792	0.0636038	0.823191	0.0188841
342	A 881 331 02 32	0.264404	0.0109861	0.803318	0.0393109
343	A 881 890 03 07	0.18154	0.103044	0.836491	0.0818276
344	A 881 432 01 01	0.0476818	-0.0194597	0.877512	0.00561846
345	0632 702 470	0.0132603	-0.0047044	0.8818	0.00561354
346	A 818 460 01 02	0.012778	-0.0106237	0.880714	0.00191518
347	A 881 320 00 02-12	0.263802	0.0212649	0.806785	0.0683887
348	A 881 491 04 49	0.05462	0.00894013	0.890407	0.0678005
349	A 881 491 02 43	0.0159564	0.0595139	0.823542	0.0245544
350	A 881 491 16 65	0.0158832	0.0592186	0.823406	0.0238981
351	A 881 490 06 32	0.0881563	0.106231	0.755789	0.0241288
352	A 881 491 17 67	0.0498355	0.0469392	0.818457	0.0190013
353	A 881 371 01 04	0.119545	-0.027646	0.874979	0.0312722
354	A 818 500 00 09	0.1218	-0.0185418	0.879165	0.0515092
355	A 881 323 01 12	0.0648093	0.152037	0.771915	0.051616
356	A 818 522 00 92	0.0197826	0.0978978	0.831365	0.051735
357	A 881 500 03 37	0.0487625	0.0426086	0.816466	0.00937502
358	A 518 891 02 25	0.268858	0.0945412	0.750383	0.0856039
359	A 881 890 00 12	0.0366381	0.1257	0.847174	0.0849854
360	A 881 420 01 26	0.0565288	0.016644	0.89395	0.084925
361	A 881 890 00 13	0.0842016	0.360075	0.857738	0.380331
362	A 518 880 02 70	0.113239	0.274843	0.911698	0.38026
363	A 518 750 01 44	0.102907	0.248996	0.903654	0.380286
364	A 881 891 02 46	0.0615646	0.246427	0.902553	0.380298
365	A 881 890 00 15	0.365511	0.0711959	0.923794	0.38064
366	A 518 462 01 43	0.0923402	0.259956	0.897923	0.38079
367	A 518 885 01 22	0.0923744	0.295061	0.900288	0.381237
368	A 881 698 04 68	0.060803	0.142878	0.769908	0.061325
369	A 881 491 16 66	0.0158832	0.0592186	0.823406	0.0238981
370	A 881 490 06 33	0.0895407	0.110022	0.756889	0.0241295
371	A 881 491 17 68	0.048161	0.0401808	0.81535	0.00397849
372	A 881 491 02 44	0.015867	0.059153	0.823376	0.0237522
373	A 881 491 17 69	0.0500794	0.0479235	0.81891	0.0211891
374	A 881 490 06 34	0.08556	0.0991217	0.753727	0.0241275
375	A 881 491 02 45	0.0155906	0.0580375	0.822863	0.0212727
376	A 881 491 16 67	0.0158832	0.0592186	0.823406	0.0238981
377	A 818 313 01 59	0.0476894	-0.0190318	0.877545	0.00562367
378	A 881 500 03 36	0.0487625	0.0426086	0.816466	0.00937502
379	A 520 541 05 09	0.0486163	0.0993278	0.753124	0.00218746
380	A 518 822 01 20	0.0216074	0.0856278	0.832452	0.0587809
381	A 518 822 00 20	0.0216074	0.0856278	0.832452	0.0587809
382	A 881 420 01 48	0.0215779	0.0855472	0.832429	0.0587809
383	A 881 323 01 13	0.0656283	0.15574	0.773454	0.0589006
384	A 881 820 00 89	0.149706	0.357353	0.928005	0.274381
385	A 818 431 01 44	0.0503656	0.0475033	0.817541	0.00724817
386	A 818 540 06 51	0.0218099	0.0397338	0.898145	0.0807438
387	A 881 890 00 14	0.0507503	0.221489	0.795485	0.0807911
388	A 881 460 02 01	0.34837	0.277301	0.900396	0.29652
389	A 518 460 00 13	0.0927515	0.208205	0.885581	0.296169
390	A 881 522 03 38	0.0527618	0.0572807	0.821463	0.0238627
391	A 881 520 01 33	0.0531665	0.057982	0.821758	0.0238577
392	A 346 350 11 24	0.464428	0.0601386	0.824643	0.200582
393	A 881 432 01 02	0.0782155	0.190381	0.784207	0.0657251
394	A 260 350 01 20 (含止推环)	1.13037	0.387438	0.943264	0.706043
395	1109003DP	0.0123715	-0.0122641	0.87996	-0.00173113
396	A 881 491 04 50	0.0490292	-0.0136244	0.880031	0.0176434
397	A 881 490 04 45	0.0835763	-0.0235029	0.876186	0.0180833
398	A 881 490 06 35	0.08556	0.0991217	0.753727	0.0241275
399	A 881 491 17 70	0.0498274	0.0469064	0.818442	0.0189283
400	A 881 491 02 46	0.0153061	0.0568893	0.822335	0.0187203
401	A 881 491 16 68	0.0158832	0.0592186	0.823406	0.0238981
402	A 818 520 00 27	0.0653024	0.0966649	0.836163	0.0643566
403	A 881 320 00 02-13	0.263397	0.0192334	0.806014	0.0648188
404	A 881 500 03 35	0.0487625	0.0426086	0.816466	0.00937502
405	A 818 500 00 10	0.124488	-0.00769226	0.884154	0.0756259
406	A 881 491 17 71	0.0554784	0.0124046	0.892	0.0755015
407	A 518 891 02 26	0.267793	0.0894459	0.748367	0.0761699
408	A 818 553 09 01	0.0715374	0.12001	0.84594	0.104905
409	A 818 431 02 15	0.078377	0.137925	0.851319	0.104898
410	A 818 553 10 01	0.0814214	0.144839	0.852574	0.0950656
411	A 881 470 05 04	0.161161	-0.00899415	0.884252	0.0951301
412	A 881 542 00 16	0.0243748	0.0909052	0.835216	0.0653504
413	A 881 460 00 81	0.0701108	0.109575	0.840078	0.0653923
414	3703010TJ	0.670856	-0.0422151	0.878739	0.33486
415	A 881 698 04 67	0.0601054	0.0827533	0.831684	0.0609429
416	A 881 491 17 72	0.0505183	0.0496951	0.819724	0.0251271
417	A 881 490 06 36	0.08556	0.0991217	0.753727	0.0241275
418	A 881 491 16 69	0.0158832	0.0592186	0.823406	0.0238981
419	A 881 491 02 47	0.0160702	0.0599732	0.823753	0.0255754
420	A 881 891 02 47	0.0653322	0.104773	0.841223	0.105796
421	A 881 320 00 02-14	0.266536	0.025678	0.812865	0.10613
422	A 518 891 02 27	0.167684	0.135723	0.766573	0.106165
423	A 881 320 00 02-02	0.266536	0.025678	0.812865	0.10613
424	A 881 500 03 34	0.0487625	0.0426086	0.816466	0.00937502
425	A 818 553 05 06	0.0688498	0.103747	0.83744	0.0517828
426	A 881 470 05 05	0.206943	0.181343	0.863817	0.142237
427	A 881 316 04 53	0.225352	0.00877027	0.804393	0.046149
428	A 881 316 05 53	0.225352	0.00877027	0.804393	0.046149
429	A 881 371 01 05	0.118992	0.0274329	0.810882	0.0204383
430	A 881 350 00 08	0.0838202	-0.0225187	0.876639	0.0202711
431	A 881 490 06 37	0.0851535	0.0974813	0.752972	0.0204812
432	A 881 491 16 70	0.0154768	0.0575782	0.822652	0.0202518
433	A 881 491 02 48	0.015363	0.0571189	0.822441	0.0192308
434	A 881 491 17 73	0.049047	0.0437569	0.816994	0.0119274
435	A 881 331 02 33	0.26067	0.00200261	0.801978	0.0535038
436	A 881 331 01 32	0.26067	0.00200261	0.801978	0.0535038
437	A 881 500 03 33	0.0495754	0.0458894	0.817975	0.0166676
438	A 505 542 35 01	0.047283	-0.0206722	0.876791	0.00197736
439	1101141	0.0128755	-0.01023	0.880895	0.00279029
440	A 518 431 02 26	0.0131844	-0.00898334	0.881468	0.00556148
441	A 518 682 01 23	0.0476894	-0.0190318	0.877545	0.00562367
442	A 881 540 03 09	0.168773	0.529985	1.02942	0.994478
443	A 346 350 11 45	0.131503	0.538975	1.03158	0.994497
444	A 520 429 01 45	0.163381	0.538833	1.02671	0.994777
445	A 518 544 16 06	0.129345	0.545279	1.03068	0.994652
446	A 699 410 03 02	0.284491	0.523077	1.02666	0.99454
447	A 818 522 00 93	0.135562	1.1305	0.87481	1
448	A 520 420 00 18	0.172861	0.607496	0.970845	0.994688
449	A 818 522 00 06	0.165112	0.530544	1.02722	0.994611
450	A 818 520 00 28	0.16923	0.53042	1.02972	0.994467
451	A 818 431 01 45	0.162039	0.584825	1.02896	0.99541
452	A 881 290 01 14	0.157877	0.425687	1.08204	0.994159
453	A 881 350 00 09	0.219978	0.554266	1.038	0.994403
454	A 881 350 01 06	0.220335	0.620746	0.976409	0.994601
455	A 881 540 02 38	0.591196	0.423347	0.988384	0.995114
456	A 881 320 00 02-15	0.343763	0.482829	1.01151	0.994743
457	A 518 431 08 10	0.164334	0.532484	1.02687	0.994663
458	A 881 410 01 02	0.312024	0.594399	1.04826	0.994502
459	A 881 350 02 06	0.219448	0.552814	1.03758	0.994402
460	A 881 491 17 74	0.0496729	0.0462831	0.818156	0.0175427
461	A 881 491 02 49	0.0159401	0.0594483	0.823512	0.0244085
462	A 881 491 16 71	0.0158832	0.0592186	0.823406	0.0238981
463	A 881 490 06 38	0.08556	0.0991217	0.753727	0.0241275
464	A 518 891 02 07	0.369423	0.0506551	0.733168	0.0606938
465	A 818 313 01 60	0.122744	-0.0147315	0.880917	0.0599788
466	A 070 491 00 09	0.0776931	0.142545	0.855475	0.144162
467	A 818 553 10 02	0.0868934	0.166924	0.862729	0.144157
468	A 881 520 01 34	0.0667123	0.119804	0.847241	0.14425
469	A 881 320 00 02-01	0.274739	0.0426715	0.814601	0.0655104
470	A 881 490 06 39	0.08556	0.0991217	0.753727	0.0241275
471	A 881 491 03 40	0.0152736	0.056758	0.822275	0.0184286
472	A 881 491 17 75	0.0495429	0.0457582	0.817914	0.0163759
473	A 881 491 16 72	0.0158832	0.0592186	0.823406	0.0238981
474	A 881 500 03 32	0.0487625	0.0426086	0.816466	0.00937502
475	A 881 323 01 14	0.0233212	0.0835115	0.831608	0.0426103
476	A 881 320 00 02-16	0.259502	-0.00271056	0.799811	0.0430273
477	3703010TK	0.68412	-0.00222877	0.889521	0.334914
478	A 881 698 04 66	0.0601054	0.0827533	0.831684	0.0609429
479	A 881 698 04 65	0.0601054	0.0827533	0.831684	0.0609429
480	A 881 490 06 50	0.08556	0.0991217	0.753727	0.0241275
481	A 881 491 16 73	0.0158832	0.0592186	0.823406	0.0238981
482	A 881 491 17 76	0.0149809	0.0555769	0.821732	0.0158033
483	A 881 491 03 41	0.048161	0.0401808	0.81535	0.00397849
484	A 881 500 03 31	0.0495754	0.0458894	0.817975	0.0166676
485	A 518 891 02 28	0.155528	0.210828	0.796224	0.230694
486	A 881 470 05 06	0.217171	0.222515	0.882404	0.230428
487	A 881 320 00 02-17	0.280409	0.0816691	0.838611	0.230589
488	A 881 323 01 15	0.0451777	0.249966	0.813866	0.230339
489	A 818 313 01 61	0.0537238	0.00730932	0.888839	0.0594458
490	A 818 553 05 07	0.0698546	0.10762	0.839155	0.0595328
491	A 881 542 00 15	0.0180797	0.0635116	0.823437	0.00918872
492	A 881 540 01 17	0.153442	-0.0401471	0.869928	0.0258824
493	A 881 880 02 32	0.0525755	0.0574612	0.821574	0.0258279
494	A 881 520 02 42	0.0549666	0.0603244	0.821683	0.0115944
495	A 881 820 03 64	0.0732956	0.124366	0.847267	0.104547
496	A 818 553 05 08	0.0748786	0.128294	0.848498	0.104542
497	A 881 470 00 45	0.194774	0.0307923	0.81121	0.0432817
498	A 881 542 00 14	0.0218662	0.0799859	0.830522	0.0429706
499	A 500 370 01 08	0.216201	0.330136	0.91797	0.272893
500	A 881 500 00 95	0.238807	0.400788	0.943085	0.333386
