# Supplementary material for: Importance Degree Evaluation of Spare Parts Based on Clustering Algorithm and Back-Propagation Neural Network
Source: Hindawi journal article supplement (doi:10.1155/2020/6161825), 2020-05-22
Supplement: f1 [file 6161825.f1.zip › 6161825.f1/Appendix 3.xls]

## Sheet: Sheet1
Part number	Part Number	Samples-based importance degree	The proposed method-based Importance degree	Relative error
1	A 881 316 05 52	0.0570879	0.0570871	8.0947e-07
2	A 881 350 00 06	0.0567341	0.0566829	5.12059e-05
3	A 881 316 04 52	0.0570879	0.0570781	9.88876e-06
4	A 520 541 05 01	0.19209	0.192017	7.28333e-05
5	A 881 500 03 55	0.191947	0.19161	0.00033753
6	A 518 820 25 75	0.191947	0.191933	1.3981e-05
7	A 881 331 02 28	0.261637	0.26163	7.50729e-06
8	A 881 331 01 28	0.261668	0.261572	9.58115e-05
9	A 520 541 05 02	0.261306	0.261271	3.45688e-05
10	A 518 750 00 18	0.333886	0.333885	1.63757e-07
11	A 518 671 02 10	0.334024	0.333951	7.34693e-05
12	A 881 820 04 61	0.333951	0.333906	4.5128e-05
13	A 881 820 03 61	0.333951	0.333903	4.84486e-05
14	A 881 698 04 75	0.0609429	0.060939	3.88816e-06
15	A 881 820 02 56	0.0609053	0.0608462	5.90865e-05
16	A 881 820 01 56	0.0609053	0.0608734	3.18532e-05
17	A 518 891 02 17	0.0352845	0.0350133	0.000271174
18	A 520 541 05 03	0.1775	0.177417	8.30159e-05
19	A 881 331 02 29	0.080136	0.0801282	7.78488e-06
20	A 881 331 01 29	0.0801458	0.0801249	2.09539e-05
21	A 346 353 07 35	0.154651	0.154597	5.40377e-05
22	A 881 500 00 99	0.333386	0.333376	1.00079e-05
23	A 070 490 06 61	0.0629716	0.0629397	3.18872e-05
24	A 881 490 04 40	0.0628541	0.0628022	5.18978e-05
25	A 518 544 15 03	0.130196	0.130189	7.78488e-06
26	A 818 522 00 03	0.130284	0.130273	1.12956e-05
27	A 881 320 00 02-03	0.130572	0.130458	0.000113948
28	A 818 520 00 19	0.130225	0.130158	6.76145e-05
29	A 881 890 00 05	0.182	0.181894	0.000106282
30	A 881 323 01 00	0.181868	0.181867	8.04826e-07
31	A 070 490 00 09	0.181892	0.18173	0.000162461
32	A 518 891 02 18	0.182538	0.182526	1.18108e-05
33	A 128 891 01 46	0.142114	0.142102	1.20345e-05
34	A 518 891 02 19	0.142768	0.142725	4.20406e-05
35	A 818 500 00 03	0.142151	0.14208	7.08896e-05
36	A 881 820 03 62	0.142154	0.142147	6.81115e-06
37	A 881 890 00 77	0.0686025	0.0685605	4.20406e-05
38	A 881 890 01 06	0.0684711	0.0684091	6.20749e-05
39	A 518 891 02 05	0.0686001	0.0684487	0.000151346
40	A 881 491 17 45	0.0444247	0.0444145	1.02138e-05
41	A 818 520 00 20	0.0445403	0.0445335	6.81115e-06
42	A 818 522 00 87	0.0448386	0.0448261	1.24346e-05
43	A 518 891 02 06	0.0384168	0.0383907	2.60827e-05
44	A 881 890 02 06	0.100375	0.100347	2.77872e-05
45	A 881 698 04 76	0.0609429	0.0608657	7.71759e-05
46	A 881 890 01 07	0.0771448	0.0770575	8.72837e-05
47	A 881 371 01 02	0.0585952	0.0585742	2.09539e-05
48	A 881 698 04 77	0.0609429	0.0607501	0.000192736
49	A 881 698 04 78	0.0609429	0.0608907	5.21968e-05
50	A 881 460 00 80	0.0403318	0.0402255	0.000106237
51	A 881 240 02 18	0.0381418	0.0381221	1.97017e-05
52	A 818 313 01 58	0.0609672	0.0609527	1.44275e-05
53	A 881 323 01 01	0.060847	0.060751	9.59676e-05
54	A 881 320 00 02-04	0.0612588	0.0612295	2.92466e-05
55	A 518 830 02 63	0.156062	0.156056	5.44169e-06
56	A 881 542 00 17	0.155755	0.155662	9.33245e-05
57	A 257 350 00 24	0.152643	0.152582	6.1102e-05
58	A 518 891 02 20	0.0427119	0.0426282	8.36573e-05
59	A 518 460 00 11	0.0358416	0.0357893	5.23454e-05
60	A 520 541 05 05	0.262449	0.26243	1.91266e-05
61	A 881 331 01 30	0.262812	0.262671	0.00014044
62	A 881 331 02 30	0.262781	0.262637	0.000144161
63	A 518 820 00 80	0.311896	0.311804	9.15463e-05
64	A 881 820 00 85	0.311912	0.311838	7.34031e-05
65	A 881 491 04 45	0.31177	0.311765	5.44169e-06
66	A 518 430 02 26	0.311708	0.31166	4.85242e-05
67	A 881 491 04 46	0.0348889	0.0347497	0.000139204
68	A 881 320 00 02-05	0.035425	0.0352856	0.000139466
69	A 881 320 01 02	0.0972595	0.0971945	6.50125e-05
70	A 518 820 25 78	0.0968864	0.0968188	6.76006e-05
71	A 881 500 03 52	0.0969914	0.096977	1.44275e-05
72	A 881 320 01 12	0.0969914	0.0969679	2.35127e-05
73	A 520 541 05 06	0.0969914	0.0969427	4.87406e-05
74	A 881 500 00 98	0.0970175	0.0970031	1.44275e-05
75	A 881 323 01 02	0.0402678	0.0402443	2.35127e-05
76	A 818 522 00 88	0.0406454	0.0404921	0.000153276
77	A 518 891 02 21	0.0425875	0.0420822	0.000505287
78	A 881 491 16 49	0.0419555	0.0418512	0.000104278
79	A 881 698 04 79	0.0609429	0.0609194	2.35127e-05
80	A 881 323 01 04	0.161993	0.161979	1.44275e-05
81	A 881 470 05 02	0.162197	0.162184	1.33258e-05
82	A 881 331 02 31	0.080136	0.0800991	3.69034e-05
83	A 505 350 00 09	0.171483	0.171364	0.000118488
84	A 505 541 35 01	0.329739	0.32969	4.9271e-05
85	A 500 400 23 02	0.118521	0.118479	4.22395e-05
86	A 818 520 00 21	0.037115	0.0369905	0.000124466
87	A 818 522 00 89	0.0372715	0.0372166	5.49081e-05
88	A 881 540 01 49	0.121726	0.121658	6.76894e-05
89	A 518 671 02 11	0.333865	0.3338	6.53812e-05
90	A 881 698 04 74	0.0609429	0.0609188	2.41113e-05
91	A 881 698 04 73	0.0609429	0.0608925	5.03861e-05
92	A 881 491 01 42	0.0384833	0.0380072	0.000476058
93	A 881 698 04 72	0.0609429	0.0609284	1.44275e-05
94	A 818 431 01 43	0.0355234	0.0354441	7.92782e-05
95	A 818 500 00 05	0.0356478	0.0355518	9.59676e-05
96	A 881 470 05 03	0.17725	0.177205	4.56358e-05
97	A 881 323 01 05	0.177154	0.17714	1.44275e-05
98	A 518 830 02 65	0.141608	0.141594	1.44275e-05
99	A 257 353 00 35	0.118057	0.117912	0.000144161
100	A 520 350 01 45	0.714669	0.714645	2.35127e-05
101	A 505 356 23 01	0.0900783	0.0900572	2.10578e-05
102	A 520 250 01 15	0.104822	0.104692	0.000129546
103	A 881 500 00 97	0.333377	0.333342	3.4907e-05
104	A 818 520 00 22	0.121893	0.121831	6.16228e-05
105	A 881 320 00 02-07	0.12224	0.122195	4.44619e-05
106	A 881 371 01 03	0.121886	0.12176	0.000125478
107	A 818 500 00 06	0.121886	0.121742	0.000144161
108	A 500 401 23 02	0.121789	0.12174	4.87406e-05
109	A 881 698 04 71	0.0609429	0.0609119	3.09766e-05
110	A 881 820 00 87	0.0916249	0.0914955	0.000129424
111	A 881 890 01 05	0.0917974	0.0917485	4.89545e-05
112	A 518 544 16 03	0.0911573	0.0910277	0.000129604
113	A 818 520 00 23	0.0912015	0.0911871	1.44275e-05
114	A 881 890 00 08	0.0911359	0.091081	5.49081e-05
115	A 881 820 03 63	0.0470937	0.047058	3.56624e-05
116	A 881 540 01 29	0.0519318	0.0518794	5.2386e-05
117	A 818 500 00 07	0.0520561	0.0520004	5.57634e-05
118	A 518 830 02 66	0.0519939	0.0519795	1.44275e-05
119	A 881 491 04 48	0.0519318	0.0517876	0.000144161
120	A 881 320 00 02-08	0.090298	0.0902579	4.00217e-05
121	A 881 323 01 07	0.0898966	0.0898732	2.3412e-05
122	A 518 891 02 22	0.0906283	0.0906138	1.44275e-05
123	A 881 890 02 07	0.104084	0.10406	2.35127e-05
124	A 881 698 04 70	0.0609429	0.0608537	8.91737e-05
125	A 518 544 15 04	0.0943216	0.0941953	0.000126361
126	A 518 544 16 04	0.0943216	0.0943201	1.50363e-06
127	A 818 520 00 24	0.094471	0.0943879	8.31704e-05
128	A 518 544 15 05	0.176651	0.176625	2.5543e-05
129	A 518 544 16 05	0.176651	0.176636	1.44275e-05
130	A 881 890 00 09	0.17671	0.176708	2.30108e-06
131	A 818 520 00 25	0.176779	0.176753	2.65378e-05
132	A 511 423 00 33	0.16688	0.166678	0.000201487
133	A 881 323 01 09	0.0463514	0.0462683	8.30916e-05
134	A 881 320 00 02-09	0.0468471	0.0467223	0.000124847
135	A 881 320 00 02-10	0.079028	0.0790041	2.3847e-05
136	A 881 470 00 44	0.0787364	0.0787268	9.51351e-06
137	A 505 541 32 01 凌云	0.0785498	0.0785263	2.35127e-05
138	A 881 500 03 40	0.0969914	0.0969191	7.23538e-05
139	A 881 320 01 13	0.0969914	0.0968384	0.000152988
140	A 881 500 00 96	0.104533	0.104487	4.61826e-05
141	A 518 891 02 23	0.162523	0.162457	6.50688e-05
142	A 881 890 00 10	0.161881	0.161815	6.62216e-05
143	A 881 323 01 10	0.161852	0.161708	0.000144161
144	A 881 540 01 48	0.189542	0.189474	6.85279e-05
145	A 385 260 05 63	0.18995	0.18993	1.97017e-05
146	A 818 553 05 05	0.189603	0.18959	1.323e-05
147	A 881 698 04 69	0.0609429	0.0609003	4.26087e-05
148	A 346 353 03 07	0.0949993	0.0949551	4.42533e-05
149	A 881 320 00 02-11	0.0610856	0.0605803	0.000505287
150	A 881 820 04 62	0.0470937	0.0470449	4.87406e-05
151	A 881 323 01 11	0.0646968	0.0646771	1.97017e-05
152	A 818 522 00 05	0.0645894	0.0644536	0.0001358
153	A 818 522 00 91	0.0651993	0.0651899	9.36587e-06
154	A 881 890 00 11	0.0377042	0.0376807	2.35127e-05
155	A 881 491 17 66	0.0493725	0.0493375	3.4907e-05
156	A 518 891 02 24	0.0498905	0.0497768	0.000113738
157	A 520 541 05 08	0.1775	0.177355	0.000144463
158	A 881 331 02 32	0.0393109	0.0392549	5.60286e-05
159	A 881 890 03 07	0.0818276	0.0817355	9.20697e-05
160	A 881 320 00 02-12	0.0683887	0.0683663	2.23975e-05
161	A 881 491 04 49	0.0678005	0.0677007	9.98219e-05
162	A 818 500 00 09	0.0515092	0.0506211	0.000888042
163	A 881 323 01 12	0.051616	0.0515587	5.72944e-05
164	A 818 522 00 92	0.051735	0.0516894	4.56358e-05
165	A 518 891 02 25	0.0856039	0.0855854	1.84967e-05
166	A 881 890 00 12	0.0849854	0.0848412	0.000144161
167	A 881 420 01 26	0.084925	0.0849015	2.35127e-05
168	A 881 890 00 13	0.380331	0.380307	2.35127e-05
169	A 518 880 02 70	0.38026	0.380132	0.000127283
170	A 518 750 01 44	0.380286	0.380284	1.53757e-06
171	A 881 891 02 46	0.380298	0.380274	2.35127e-05
172	A 881 890 00 15	0.38064	0.380561	7.95043e-05
173	A 518 462 01 43	0.38079	0.380772	1.81232e-05
174	A 518 885 01 22	0.381237	0.381158	7.96619e-05
175	A 881 698 04 68	0.061325	0.061046	0.000279022
176	A 518 822 01 20	0.0587809	0.0586368	0.000144161
177	A 518 822 00 20	0.0587809	0.0587574	2.35127e-05
178	A 881 420 01 48	0.0587809	0.0586935	8.73745e-05
179	A 881 323 01 13	0.0589006	0.0588486	5.20062e-05
180	A 881 820 00 89	0.274381	0.274239	0.000142287
181	A 818 540 06 51	0.0807438	0.0803144	0.00042948
182	A 881 890 00 14	0.0807911	0.0807608	3.02971e-05
183	A 881 460 02 01	0.29652	0.296497	2.35127e-05
184	A 518 460 00 13	0.296169	0.296145	2.39374e-05
185	A 346 350 11 24	0.200582	0.200288	0.000294517
186	A 881 432 01 02	0.0657251	0.0656749	5.01965e-05
187	A 260 350 01 20 (含止推环)	0.706043	0.706008	3.4907e-05
188	A 818 520 00 27	0.0643566	0.0642381	0.000118488
189	A 881 320 00 02-13	0.0648188	0.0647497	6.91114e-05
190	A 818 500 00 10	0.0756259	0.075579	4.68398e-05
191	A 881 491 17 71	0.0755015	0.0754754	2.60855e-05
192	A 518 891 02 26	0.0761699	0.0760307	0.000139204
193	A 818 553 09 01	0.104905	0.104879	2.60855e-05
194	A 818 431 02 15	0.104898	0.104879	1.97017e-05
195	A 818 553 10 01	0.0950656	0.0949696	9.59676e-05
196	A 881 470 05 04	0.0951301	0.0950726	5.75029e-05
197	A 881 542 00 16	0.0653504	0.0653348	1.5553e-05
198	A 881 460 00 81	0.0653923	0.0652738	0.000118488
199	3703010TJ	0.33486	0.334765	9.52224e-05
200	A 881 698 04 67	0.0609429	0.0609229	1.99509e-05
201	A 881 891 02 47	0.105796	0.105773	2.35127e-05
202	A 881 320 00 02-14	0.10613	0.106126	4.70524e-06
203	A 518 891 02 27	0.106165	0.106021	0.000144161
204	A 881 320 00 02-02	0.10613	0.106116	1.44275e-05
205	A 818 553 05 06	0.0517828	0.0516595	0.000123331
206	A 881 470 05 05	0.142237	0.142214	2.35127e-05
207	A 881 316 04 53	0.046149	0.0460047	0.000144313
208	A 881 316 05 53	0.046149	0.0460523	9.66869e-05
209	A 881 331 02 33	0.0535038	0.0534495	5.42926e-05
210	A 881 331 01 32	0.0535038	0.0534841	1.97017e-05
211	A 881 540 03 09	0.994478	0.994354	0.000123331
212	A 346 350 11 45	0.994497	0.994353	0.000144161
213	A 520 429 01 45	0.994777	0.994612	0.000164443
214	A 518 544 16 06	0.994652	0.994584	6.76894e-05
215	A 699 410 03 02	0.99454	0.994518	2.24215e-05
216	A 520 420 00 18	0.994688	0.994675	1.30324e-05
217	A 818 522 00 06	0.994611	0.994574	3.7324e-05
218	A 818 520 00 28	0.994467	0.994444	2.35127e-05
219	A 818 431 01 45	0.99541	0.995352	5.86152e-05
220	A 881 290 01 14	0.994159	0.994056	0.000103584
221	A 881 350 00 09	0.994403	0.994385	1.72624e-05
222	A 881 350 01 06	0.994601	0.994457	0.000144161
223	A 881 540 02 38	0.995114	0.995091	2.29307e-05
224	A 881 320 00 02-15	0.994743	0.994723	1.97017e-05
225	A 518 431 08 10	0.994663	0.994565	9.77119e-05
226	A 881 410 01 02	0.994502	0.994479	2.35621e-05
227	A 881 350 02 06	0.994402	0.994382	2.04313e-05
228	A 518 891 02 07	0.0606938	0.0606589	3.4907e-05
229	A 818 313 01 60	0.0599788	0.0599324	4.6393e-05
230	A 070 491 00 09	0.144162	0.144157	5.74912e-06
231	A 818 553 10 02	0.144157	0.144144	1.28218e-05
232	A 881 520 01 34	0.14425	0.144227	2.35127e-05
233	A 881 320 00 02-01	0.0655104	0.0655026	7.80864e-06
234	A 881 323 01 14	0.0426103	0.0425129	9.74195e-05
235	A 881 320 00 02-16	0.0430273	0.0429582	6.90503e-05
236	3703010TK	0.334914	0.334779	0.000134918
237	A 881 698 04 66	0.0609429	0.0609226	2.02957e-05
238	A 881 698 04 65	0.0609429	0.0609284	1.44275e-05
239	A 518 891 02 28	0.230694	0.230686	7.80864e-06
240	A 881 470 05 06	0.230428	0.224488	0.00594027
241	A 881 320 00 02-17	0.230589	0.230463	0.000125478
242	A 881 323 01 15	0.230339	0.230203	0.0001358
243	A 818 313 01 61	0.0594458	0.0594223	2.35127e-05
244	A 818 553 05 07	0.0595328	0.0582193	0.00131347
245	A 881 820 03 64	0.104547	0.104524	2.20324e-05
246	A 818 553 05 08	0.104542	0.104398	0.000144161
247	A 881 470 00 45	0.0432817	0.043136	0.000145755
248	A 881 542 00 14	0.0429706	0.0429562	1.44275e-05
249	A 500 370 01 08	0.272893	0.272827	6.59861e-05
250	A 881 500 00 95	0.333386	0.333013	0.000373043
